# Supplementary material
Source: PubMed Central journal article supplement (PMC4136677)
Supplement: ol501590n_si_001.pdf [file ol501590n_si_001.pdf]

## Oxetanyl Peptides: Novel Peptidomimetic Modules for Medicinal Chemistry

Martin McLaughlin, Ryo Yazaki, Thomas C. Fessard, and Erick M. Carreira\*

*Department of Chemistry and Applied Biosciences, Laboratorium für Organische Chemie  
Vladimir-Prelog-Weg 3, Eidgenössische Technische Hochschule Zürich  
CH-8093 Zürich, Switzerland  
E-mail: carreira@org.chem.ethz.ch*

### Supporting Information: Experimentals

#### General Methods:

All reactions were performed in heat gun or oven dried glass ware under nitrogen or argon using dry solvents unless otherwise noted. Dry diethyl ether, tetrahydrofuran, toluene, dichloromethane were obtained by passing inhibitor free, HPLC grade solvents through activated alumina columns. Methanol was distilled from magnesium turnings under and atmosphere of dry nitrogen. Triethylamine, pyridine, TMEDA were distilled from KOH under and atmosphere of dry nitrogen. Diisopropylethylamine was distilled from sodium hydride under and atmosphere of dry nitrogen.  $\text{Ti}(\text{OEt})_4$  was distilled under reduced pressure (0.5 torr). Commercially available chemicals were used as received unless noted otherwise. Reactions were monitored by thin-layer chromatography carried out on 250  $\mu\text{m}$  Merck silica gel plates (TLC silicagel 60 F254) and visualized using UV light, or appropriate stains: ninhydrin, potassium permanganate, phosphomolybdic acid, vanillin. Concentrations *in vacuo* were performed by a rotary evaporator at 40 °C. Compounds **1**,<sup>i</sup> **42**,<sup>ii</sup> **44**,<sup>iii</sup> were synthesized according to literature procedures. Compounds (**3**, **4**, **5**, **6**, and **7**) were synthesized according to general procedure G.  $^1\text{H}$  NMR spectra were recorded on a VARIAN Mercury 300 MHz or a Gemini 300 MHz spectrometer in the indicated deuterated solvent.  $^1\text{H}$  NMR chemical shifts are reported relative to residual  $\text{CHCl}_3$  (7.26 ppm) or  $\text{C}_6\text{D}_6$  (7.15 ppm).  $^{13}\text{C}$ -NMR spectra were recorded with  $^1\text{H}$ -decoupling on a VARIAN Mercury 75 MHz spectrometer in the indicated deuterated solvent.  $^{13}\text{C}$ -NMR chemical shifts were reported relative to the central line of  $\text{CDCl}_3$  (77.23 ppm) or  $\text{C}_6\text{D}_6$  (128.62 ppm). Infrared spectra were recorded neat on a Varian 800 FT-IR Scimilair Series spectrophotometer or a Perkin Elmer Spectrum BX FT-IR. Optical rotations were measured on a JASCO DIP-1000 digital polarimeter. High resolution mass spectrometric measurements were performed by the mass spectrometry service of the Laboratorium für Organische Chemie at the ETH Zürich. ESI measurements were performed on a *Bruker Daltonics maxis* and *Varian Ionspec ESI-FT-ICR*.

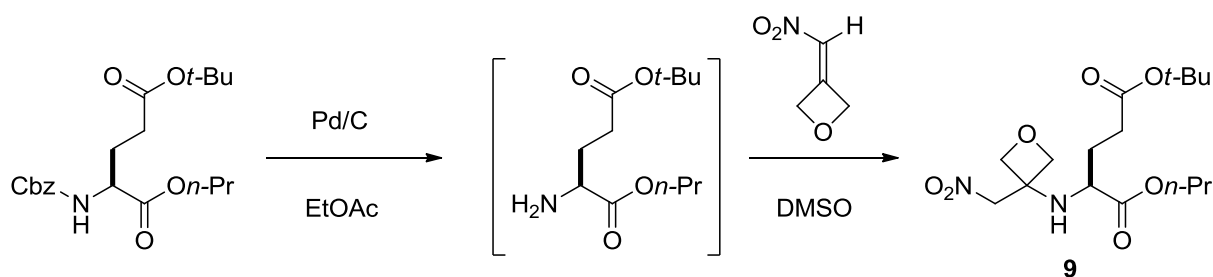

**General Procedure A: Conjugate Addition of Protected Amino Acid to 3-(nitromethylene)oxetane.** The synthesis of **(S)-5-tert-butyl 1-propyl 2-((3-(nitromethyl)oxetan-3-yl)amino)pentanedioate (9)**: To a flask was sequentially added (S)-5-tert-butyl 1-propyl 2-(((benzyloxy)carbonyl)amino)pentanedioate (0.409 g, 1.079 mmol), EtOAc (19.6 mL) and Pd/C (0.052 g, 0.049 mmol). The reaction mixture was then stirred for 1 hour under an H<sub>2</sub> atmosphere. After completion of the reaction was confirmed by TLC, the reaction mixture was filtered through celite and concentrated *in vacuo* to afford a crude residue which was used in the next step without further purification. The residue was dissolved in DMSO (4.9 mL) and 3-(nitromethylene)oxetane (0.113 g, 0.981 mmol) was added in one portion. The reaction was then stirred for 2 hours at room temperature, at which point it was diluted with a mixture of ether/EtOAc (ca. 3/1, 100 mL) and washed successively with 50% brine, water, and brine, (50 mL each) dried over Na<sub>2</sub>SO<sub>4</sub>, filtered and concentrated *in vacuo*. The resulting residue was purified with silica gel chromatography (20-33% EtOAc/hexane) to afford nitro alkane **9** as a colorless oil (275 mg, 78% yield).

**Data for (S)-5-tert-butyl 1-propyl 2-((3-(nitromethyl)oxetan-3-yl)amino)pentanedioate (9)**: Colorless oil; <sup>1</sup>H NMR (300 MHz, CDCl<sub>3</sub>) δ 4.83-4.69 (m, 2H), 4.59-4.48 (m, 2H), 4.42 (d, *J* = 7.2 Hz, 1H), 4.36 (d, *J* = 7.0 Hz, 1H), 4.00 (d, *J* = 6.8 Hz, 2H), 3.48 (s (br), 1H), 2.34-2.20 (m, 3H), 1.99-1.81 (m, 1H), 1.73-1.52 (m, 3H), 1.37 (s, 9H), 0.88 (t, *J* = 7.4 Hz, 3H); <sup>13</sup>C NMR (75 MHz, CDCl<sub>3</sub>) δ 175.0, 172.0, 80.4, 78.8, 78.5, 78.2, 67.0, 59.3, 54.9, 31.3, 29.3, 28.0, 21.9, 10.4; IR (thin film, NaCl) 2970, 2881, 1722, 1555, 1150, 979, 733 cm<sup>-1</sup>; HRMS (ESI, H) *m/z* calc'd for C<sub>16</sub>H<sub>29</sub>N<sub>2</sub>O<sub>7</sub> (M + H)<sup>+</sup> 361.1969, found 361.1974; [α]<sub>D</sub><sup>23</sup> -11.9 (c 0.50, CHCl<sub>3</sub>).

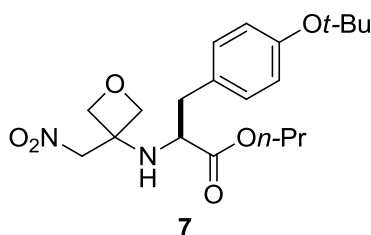

**Data for (S)-propyl 3-(4-(tert-butoxy)phenyl)-2-((3-(nitromethyl)oxetan-3-yl)amino)propanoate (7)**: (colorless oil, 15-18% EtOAc/hexanes, 71% yield); <sup>1</sup>H NMR (300 MHz,

CDCl<sub>3</sub>) δ 7.03 (d, *J* = 8.4 Hz, 2H), 6.88 (d, *J* = 8.4 Hz, 2H), 4.94-4.62 (m, 2H), 4.48 (d, *J* = 7.1 Hz, 1H), 4.35-4.31 (m, 3H), 4.10-3.86 (m, 2H), 3.63 (t, *J* = 6.3 Hz, 1H), 2.91 (dd, *J* = 13.3, 6.2 Hz, 1H), 2.77 (dd, *J* = 13.3, 7.5 Hz, 1H), 2.38 (s (br), 1H), 1.73-1.48 (m, 2H), 1.30 (s, 9H), 0.86 (t, *J* = 7.4 Hz, 3H); <sup>13</sup>C NMR (75 MHz, CDCl<sub>3</sub>) δ 174.3, 153.9, 131.4, 129.6, 124.0, 78.6, 78.51, 78.48, 78.4, 67.0, 59.4, 57.7, 40.2, 28.9, 22.0, 10.5; IR (thin film, NaCl) 2973, 2879, 1728, 1555, 1505, 1159, 982, 894 cm<sup>-1</sup>; HRMS (ESI, H) *m/z* calc'd for C<sub>20</sub>H<sub>31</sub>N<sub>2</sub>O<sub>6</sub> (M + H)<sup>+</sup> 395.2177, found 395.2183; [α]<sub>D</sub><sup>25</sup> -2.37 (c 0.50, CHCl<sub>3</sub>).

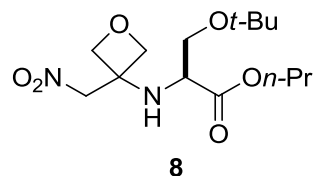

**Data for (S)-propyl 3-(tert-butoxy)-2-((3-(nitromethyl)oxetan-3-yl)amino)propanoate (8):** (Pale yellow oil, 33-50% EtOAc/hexanes, 81% yield); <sup>1</sup>H NMR (300 MHz, CDCl<sub>3</sub>) δ 4.81 (s, 2H), 4.60 (d, *J* = 7.0 Hz, 1H), 4.52 (s, 2H), 4.44 (d, *J* = 7.0 Hz, 1H), 4.03 (td, *J* = 6.7, 1.8 Hz, 2H), 3.64-3.54 (m, 1H), 3.52-3.43 (m, 2H), 2.58 (s (br), 1H), 1.71-1.49 (m, 2H), 1.09 (s, 9H), 0.90 (d, *J* = 7.4 Hz, 3H); <sup>13</sup>C NMR (75 MHz, CDCl<sub>3</sub>) δ 172.9, 79.2, 79.0, 78.2, 73.4, 66.9, 64.0, 59.4, 56.7, 27.4, 22.1, 10.6; IR (thin film, NaCl) 2972, 2879, 1732, 1554, 1190, 1090, 978, 749 cm<sup>-1</sup>; HRMS (ESI, H) *m/z* calc'd for C<sub>14</sub>H<sub>27</sub>N<sub>2</sub>O<sub>6</sub> (M + H)<sup>+</sup> 319.1864, found 319.1863; [α]<sub>D</sub><sup>24</sup> -12.5 (c 0.50, CHCl<sub>3</sub>).

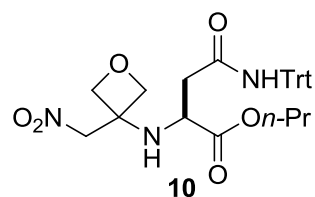

**Data for (S)-propyl 2-((3-(nitromethyl)oxetan-3-yl)amino)-4-oxo-4-(tritylamino)butanoate (10):** (white solid, 25% acetone/hexanes, 73% yield); <sup>1</sup>H NMR (300 MHz, CDCl<sub>3</sub>) δ 7.47-7.12 (m, 15H), 7.08 (s, 1H), 4.75 (s, 2H), 4.63 (d, *J* = 7.1 Hz, 1H), 4.51 (d, *J* = 7.2 Hz, 1H), 4.43 (d, *J* = 7.2 Hz, 1H), 4.34 (d, *J* = 7.1 Hz, 1H), 4.04 (t, *J* = 6.7 Hz, 2H), 3.90 (s (br), 1H), 2.79 (d, *J* = 6.2 Hz, 1H), 2.69 (dd, *J* = 15.0, 3.9 Hz, 1H), 2.55 (dd, *J* = 15.0, 8.3 Hz, 1H), 1.73-1.54 (m, 2H), 0.92 (t, *J* = 7.4 Hz, 3H); <sup>13</sup>C NMR (75 MHz, CDCl<sub>3</sub>) δ 173.9, 168.0, 144.1, 128.5, 127.8, 126.9, 78.7, 77.7, 70.8, 67.5, 59.3, 53.0, 41.9, 22.0, 10.6; IR (thin film, NaCl) 2966, 2360, 1730, 1668, 1552, 1275, 1180, 750 cm<sup>-1</sup>; HRMS (ESI, H) *m/z* calc'd for C<sub>30</sub>H<sub>34</sub>N<sub>3</sub>O<sub>6</sub> (M + H)<sup>+</sup> 532.2442, found 532.2440; [α]<sub>D</sub><sup>26</sup> -21.9 (c 0.50, CHCl<sub>3</sub>).

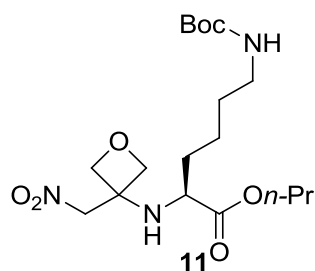

**Data for (S)-propyl 6-((tert-butoxycarbonyl)amino)-2-((3-(nitromethyl)oxetan-3-yl)amino)hexanoate (11):** (colorless oil, 25-35% EtOAc/hexanes, 66% yield);  $^1\text{H}$  NMR (400 MHz,  $\text{CDCl}_3$ )  $\delta$  4.89–4.72 (m, 2H), 4.61 (dd,  $J = 15.1, 7.1$  Hz, 2H), 4.57-4.49 (m, 2H), 4.41 (d,  $J = 7.0$  Hz, 1H), 4.06 (t,  $J = 6.8$  Hz, 2H), 3.43 (dd,  $J = 7.5, 5.6$  Hz, 1H), 3.12-3.03 (m, 2H), 2.33 (s (br), 1H), 1.71-1.61 (m, 2H), 1.59–1.23 (m, 15 H), 0.94 (t,  $J = 7.4$  Hz, 3H);  $^{13}\text{C}$  NMR (100 MHz,  $\text{CDCl}_3$ )  $\delta$  175.6, 156.2, 79.3, 79.2, 79.0, 78.6, 67.3, 59.8, 56.0, 40.4, 34.2, 30.0, 28.6, 23.0, 22.1, 10.5; IR (thin film, NaCl) 3344, 2970, 2935, 1703, 1555, 1365, 1247, 1172, 982  $\text{cm}^{-1}$ ; HRMS (ESI, TOF-MS)  $m/z$  calcd for:  $\text{C}_{18}\text{H}_{34}\text{N}_3\text{O}_7$  ( $\text{M}+\text{H}$ ) $^+$  404.2391; found ( $\text{M}+\text{H}$ ) $^+$  404.2381;  $[\alpha]_{\text{D}}^{20} -6.3$  (c 1.00,  $\text{CHCl}_3$ ).

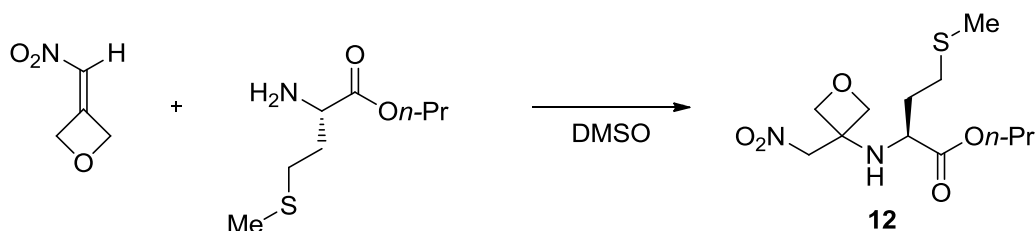

**General Procedure (B): Conjugate addition of free based amino acids to 3-(nitromethylene)oxetane.** The synthesis of (S)-propyl 4-(methylthio)-2-((3-(nitromethyl)oxetan-3-yl)amino)butanoate (12): To a solution of (S)-propyl 2-amino-4-(methylthio)butanoate (0.150 g, 0.782 mmol) in DMSO (4 mL) was added 3-(nitromethylene)oxetane (0.075 g, 0.652 mmol). The reaction was then allowed to stir at room temperature for 90 minutes. The solution was then diluted with EtOAc (100 mL) and washed with brine (2x, 50 mL), the organic layer was dried over  $\text{Na}_2\text{SO}_4$  and concentrated *in vacuo* to afford a residue. The residue was purified by flash column chromatography (20-30% EtOAc/hexanes) to afford nitro alkane 14 as a colorless oil (195 mg, 98% yield).

**Data for (S)-propyl 4-(methylthio)-2-((3-(nitromethyl)oxetan-3-yl)amino)butanoate (12):**  $^1\text{H}$  NMR (400 MHz,  $\text{CDCl}_3$ )  $\delta$  4.87-4.76 (m, 2H), 4.66 (d,  $J = 7.1$  Hz, 1H), 4.59 (d,  $J = 7.2$  Hz, 1H), 4.53 (d,  $J = 7.2$  Hz, 1H), 4.46 (d,  $J = 7.1$  Hz, 1H), 4.08 (t,  $J = 6.8$  Hz, 2H), 3.73-3.61 (m, 1H), 2.59 (dd,  $J = 8.0, 8.0$  Hz, 2H), 2.37 (d,  $J = 10.5$  Hz, 1H), 2.09 (s, 3H), 2.02-1.89 (m 1H), 1.82-1.61 (m, 3H), 0.95 (t,  $J = 7.4$  Hz, 3H);  $^{13}\text{C}$  NMR (100 MHz,  $\text{CDCl}_3$ )  $\delta$  175.7, 79.0, 78.9, 78.7, 67.5, 59.7, 54.5, 33.5, 30.4, 22.1, 15.3, 10.5; IR (thin film, NaCl) 3330, 2967, 2918, 2879, 1726, 1559, 1554, 1378, 1276, 1178, 980, 896  $\text{cm}^{-1}$ ; HRMS (ESI, TOF-MS)  $m/z$  calcd for:  $\text{C}_{12}\text{H}_{23}\text{N}_2\text{O}_5\text{S}$  ( $\text{M}+\text{H}$ ) $^+$  307.1322; found ( $\text{M}+\text{H}$ ) $^+$  307.1327;  $[\alpha]_{\text{D}}^{20} -36.0$  (c 1.00,  $\text{CHCl}_3$ ).

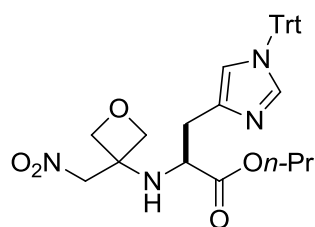

13

**Data for (S)-propyl 2-((3-(nitromethyl)oxetan-3-yl)amino)-3-(1-trityl-1H-imidazol-4-yl)propanoate (13):** (colorless oil, 25-33% acetone/hexanes, 60% yield);  $^1\text{H}$  NMR (300 MHz,  $\text{CDCl}_3$ )  $\delta$  7.48-7.22 (m, 10H), 7.19-7.02 (m, 6H), 6.59 (d,  $J = 1.0$  Hz, 1H), 4.83-4.72 (m, 2H), 4.51 (t,  $J = 7.7$  Hz, 1H), 4.42 (dd,  $J = 14.0, 8.0$  Hz, 3H), 4.13-3.87 (m, 2H), 3.79 (dd,  $J = 12.3, 7.4$  Hz, 1H), 2.95 (dd,  $J = 14.3, 4.9$  Hz, 1H), 2.77 (dd,  $J = 14.3, 8.1$  Hz, 1H), 2.62 (d,  $J = 7.8$  Hz, 1H), 1.70-1.42 (m, 2H), 0.88 (t,  $J = 7.4$  Hz, 3H);  $^{13}\text{C}$  NMR (75 MHz,  $\text{CDCl}_3$ )  $\delta$  174.5, 142.2, 138.6, 136.3, 129.6, 127.9, 119.7, 79.1, 78.5, 78.2, 75.2, 66.9, 59.3, 56.1, 33.0, 21.9, 10.5; IR (thin film, NaCl) 2967, 2878, 2355, 1729, 1553, 748, 700  $\text{cm}^{-1}$ ; HRMS (ESI, H)  $m/z$  calc'd for  $\text{C}_{32}\text{H}_{35}\text{N}_4\text{O}_5$  ( $\text{M} + \text{H}$ ) $^+$  555.2602, found 555.2592;  $[\alpha]_{\text{D}}^{26} -14.6$  ( $c$  0.40,  $\text{CHCl}_3$ ).

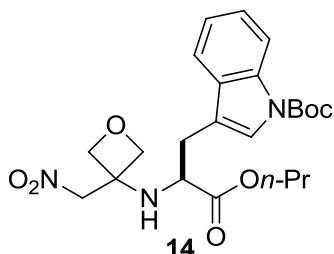

14

**Data for (S)-tert-butyl 3-(2-((3-(nitromethyl)oxetan-3-yl)amino)-3-oxo-3-propoxypropyl)-1H-indole-1-carboxylate (14):** (colorless oil, 20% EtOAc/hexanes, 76% yield);  $^1\text{H}$  NMR (300 MHz,  $\text{CDCl}_3$ )  $\delta$  8.12 (d,  $J = 7.9$  Hz, 1H), 7.54 (d,  $J = 7.1$  Hz, 1H), 7.39 (s, 1H), 7.27 (dtd,  $J = 19.9, 7.3, 1.1$  Hz, 2H), 4.91-4.68 (m, 2H), 4.56 (d,  $J = 7.1$  Hz, 1H), 4.44 (t,  $J = 7.8$  Hz, 2H), 4.35 (d,  $J = 7.1$  Hz, 1H), 3.99 (t,  $J = 6.7$  Hz, 2H), 3.81 (s (br), 1H), 3.04 (qd,  $J = 14.2, 6.5$  Hz, 2H), 2.50 (d,  $J = 5.7$  Hz, 1H), 1.66 (s, 9H), 1.61-1.48 (m, 2H), 0.84 (t,  $J = 7.4$  Hz, 3H);  $^{13}\text{C}$  NMR (75 MHz,  $\text{CDCl}_3$ )  $\delta$  174.5, 149.4, 135.3, 130.1, 124.4, 124.2, 122.4, 118.8, 115.20, 115.18, 83.6, 78.7, 78.4, 67.2, 59.5, 56.1, 30.3, 28.3, 21.8, 10.4; IR (thin film, NaCl) 2972, 2879, 1726, 1554, 1452, 1368, 1255, 1154, 1083, 747  $\text{cm}^{-1}$ ; HRMS (ESI, H)  $m/z$  calc'd for  $\text{C}_{23}\text{H}_{32}\text{N}_3\text{O}_7$  ( $\text{M} + \text{H}$ ) $^+$  462.2235, found 462.2236;  $[\alpha]_{\text{D}}^{25} +1.47$  ( $c$  0.50,  $\text{CHCl}_3$ ).

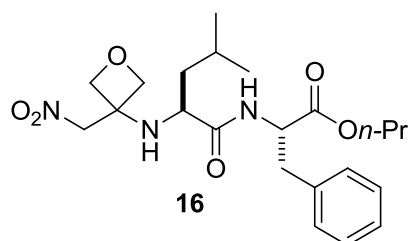

**Data for (S)-propyl 2-((S)-4-methyl-2-((3-(nitromethyl)oxetan-3-yl)amino)pentanamido)-3-phenylpropanoate (16):** (colorless oil, 20-50% EtOAc/hexanes, 80%);  $^1\text{H}$  NMR (300 MHz,  $\text{CDCl}_3$ )  $\delta$  7.33-7.18 (m, 4H), 7.12-7.07 (m, 2H), 4.80-4.57 (m, 4H), 4.50 (d,  $J = 7.6$  Hz, 1H), 4.32 (dd,  $J = 14.7, 7.4$  Hz, 2H), 4.05 (td,  $J = 6.7, 1.5$  Hz, 2H), 3.50-3.36 (m, 1H), 3.15 (dd,  $J = 13.9, 5.5$  Hz, 1H), 2.98 (dd,  $J = 13.9, 7.7$  Hz, 1H), 2.03 (d,  $J = 2.4$  Hz, 1H), 1.65-1.54 (m, 3H), 1.46-1.35 (m, 1H), 1.26-1.17 (m, 1H), 0.96-0.80 (m, 9H);  $^{13}\text{C}$  NMR (75 MHz,  $\text{CDCl}_3$ )  $\delta$  174.3, 171.3, 135.8, 129.0, 128.4, 127.0, 79.5, 77.3, 76.7, 67.1, 59.0, 55.7, 52.6, 43.7, 37.9, 24.7, 23.2, 22.0, 21.9, 10.4; IR (thin film, NaCl) 3319, 2958, 2878, 1734, 1656, 1552,  $\text{cm}^{-1}$ ; HRMS (ESI, H)  $m/z$  calc'd for  $\text{C}_{22}\text{H}_{34}\text{N}_3\text{O}_6$  ( $\text{M} + \text{H}$ ) $^+$  436.2442, found 436.2436;  $[\alpha]_{\text{D}}^{28} -8.79$  (c 0.66,  $\text{CHCl}_3$ ).

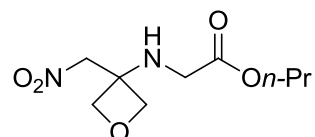

**Data for Propyl 2-((3-(nitromethyl)oxetan-3-yl)amino)acetate (2):** (colorless oil, 50-100% EtOAc/cyclohexane, 59% yield);  $^1\text{H}$  NMR (300 MHz,  $\text{CDCl}_3$ )  $\delta$  4.82 (s, 2H), 4.62 (d,  $J = 7.3$  Hz, 2H), 4.56 (d,  $J = 7.3$  Hz, 2H), 4.09 (t,  $J = 6.8$  Hz, 2H), 3.52 (s, 2H), 2.35 (s (br), 1H), 1.65 (q,  $J = 7.2$  Hz, 2H), 0.93 (t,  $J = 7.5$  Hz, 3H);  $^{13}\text{C}$  NMR (75 MHz,  $\text{CDCl}_3$ )  $\delta$  171.7, 78.5, 78.3, 67.1, 59.5, 44.9, 22.1, 10.5; IR (thin film) 3338, 1735, 1554, 1382, 1206, 981  $\text{cm}^{-1}$ ; (ESI, H)  $m/z$  calcd for  $\text{C}_9\text{H}_{17}\text{N}_2\text{O}_5$  ( $\text{M} + \text{H}$ ) $^+$  233.1132, found ( $\text{M} + \text{H}$ ) $^+$  233.1136.

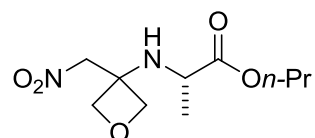

**Data for (S)-Propyl 2-((3-(nitromethyl)oxetan-3-yl)amino)propanoate (3):** (colorless oil, 50-100% EtOAc/cyclohexane, 74% yield);  $^1\text{H}$  NMR (300 MHz,  $\text{CDCl}_3$ )  $\delta$  4.85 (d,  $J = 12.9$  Hz, 1H), 4.80 (d,  $J = 12.9$  Hz, 1H), 4.64-4.57 (m, 2H), 4.51 (d,  $J = 7.2$  Hz, 1H), 4.41 (d,  $J = 6.9$  Hz, 1H), 4.04 (t,  $J = 6.7$  Hz, 2H), 3.56 (q,  $J = 7.0$  Hz, 1H), 2.37 (s (br), 1H), 1.71-1.57 (m, 2H), 1.28 (d,  $J = 6.9$  Hz, 3H), 0.92 (t,  $J = 7.4$  Hz, 3H);  $^{13}\text{C}$  NMR (75 MHz,  $\text{CDCl}_3$ )  $\delta$  175.6, 79.1, 79.0, 78.3, 67.1, 59.7, 51.4, 22.0, 20.6, 10.5; IR (thin film) 2963, 2874, 2360, 1727, 1554, 1450, 1377, 1285, 1193,

976  $\text{cm}^{-1}$ ; HRMS (ESI, H)  $m/z$  calcd for  $\text{C}_{10}\text{H}_{19}\text{N}_2\text{O}_5$  ( $\text{M}+\text{H}$ )<sup>+</sup> 247.1288, found ( $\text{M}+\text{H}$ )<sup>+</sup> 247.1281;  $[\alpha]_{\text{D}}^{27}$   $-14.3$  (c 0.24,  $\text{CHCl}_3$ ).

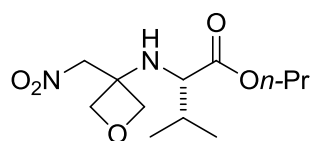

**Data for (S)-Propyl 3-methyl-2-((3-(nitromethyl)oxetan-3-yl)amino)butanoate (4):** (colorless oil, 25-50% EtOAc/cyclohexane, 72% yield);  $^1\text{H}$  NMR (300 MHz,  $\text{CDCl}_3$ )  $\delta$  4.87-4.72 (m, 2H), 4.66-4.53 (m, 2H), 4.52-4.40 (m, 2H), 4.05 (t,  $J = 6.8$  Hz, 2H), 3.20 (s (br), 1H), 2.29 (s (br), 1H), 1.98-1.82 (m, 1H), 1.73-1.56 (m, 2H), 0.98-0.81 (m, 9H);  $^{13}\text{C}$  NMR (75 MHz,  $\text{CDCl}_3$ )  $\delta$  175.3, 78.9, 78.6, 78.6, 67.0, 61.4, 59.5, 32.2, 22.1, 19.4, 18.1, 10.6; IR (thin film) 2964, 2878, 1721, 1558, 1463, 1377, 1265, 1188, 981  $\text{cm}^{-1}$ ; HRMS (ESI, H)  $m/z$  calcd for:  $\text{C}_{12}\text{H}_{23}\text{N}_2\text{O}_5$  ( $\text{M}+\text{H}$ )<sup>+</sup> 275.1601, found ( $\text{M}+\text{H}$ )<sup>+</sup> 275.1603;  $[\alpha]_{\text{D}}^{25}$   $-12.2$  (c 0.18,  $\text{CHCl}_3$ ).

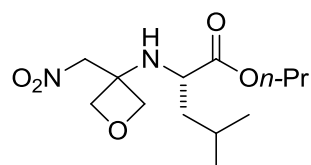

**Data for (S)-Propyl 4-methyl-2-((3-(nitromethyl)oxetan-3-yl)amino)pentanoate (5):** (colorless oil, 25-50% EtOAc/cyclohexane, 52% yield);  $^1\text{H}$  NMR (300 MHz,  $\text{CDCl}_3$ )  $\delta$  4.87 (d,  $J = 12.8$  Hz, 1H), 4.79 (d,  $J = 12.8$  Hz, 1H), 4.65-4.57 (m, 2H), 4.51 (d,  $J = 7.1$  Hz, 1H), 4.40 (d,  $J = 6.9$  Hz, 1H), 4.04 (t,  $J = 6.7$  Hz, 2H), 3.56-3.36 (m, 1H), 2.23 (br. s, 1H), 1.74-1.58 (m, 3H), 1.54-1.33 (m, 2H), 0.98-0.86 (m, 9H);  $^{13}\text{C}$  NMR (75 MHz,  $\text{CDCl}_3$ )  $\delta$  176.0, 79.1, 78.9, 78.4, 67.0, 59.7, 54.5, 43.8, 24.8, 22.9, 22.4, 22.1, 10.6; IR (thin film) 2955, 2878, 1729, 1557, 1467, 1433, 1381, 1269, 1183, 981  $\text{cm}^{-1}$ ; HRMS (ESI, H)  $m/z$  calcd for:  $\text{C}_{13}\text{H}_{25}\text{N}_2\text{O}_5$  ( $\text{M}+\text{H}$ )<sup>+</sup> 289.1758, found ( $\text{M}+\text{H}$ )<sup>+</sup> 289.1752;  $[\alpha]_{\text{D}}^{27}$   $-17.5$  (c = 0.77  $\text{CHCl}_3$ ).

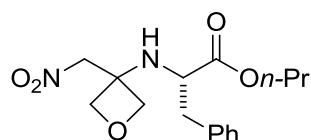

**Data for (S)-Propyl 2-((3-(nitromethyl)oxetan-3-yl)amino)-3-phenylpropanoate (6):** (colorless oil, 25-50% EtOAc/cyclohexane, 95% yield);  $^1\text{H}$  NMR (300 MHz,  $\text{CDCl}_3$ )  $\delta$  7.42-7.12 (m, 5H), 4.90-4.68 (m, 2H), 4.55 (d,  $J = 7.2$  Hz, 1H), 4.47-4.25 (m, 3H), 4.04 (t,  $J = 6.7$  Hz, 2H), 3.77-3.67 (m, 1H), 3.00 (dd,  $J = 13.3, 6.2$  Hz, 1H), 2.89 (dd,  $J = 13.3, 7.3$  Hz, 1H), 2.42 (d,  $J = 7.5$  Hz, 1H), 1.69-1.55 (m, 2H), 0.91 (t,  $J = 7.4$  Hz, 3H);  $^{13}\text{C}$  NMR (75 MHz,  $\text{CDCl}_3$ )  $\delta$  174.6, 136.6, 129.4,

128.5, 127.0, 78.8, 78.7, 78.6, 67.2, 59.5, 57.7, 40.9, 22.0, 10.5; IR (thin film) 2964, 2878, 1729, 1557, 1381, 1274, 1196, 981, 745, 701  $\text{cm}^{-1}$ ; HRMS (ESI, H)  $m/z$  calcd for:  $\text{C}_{16}\text{H}_{23}\text{N}_2\text{O}_5$  ( $\text{M}+\text{H}$ )<sup>+</sup> 323.1601, found ( $\text{M}+\text{H}$ )<sup>+</sup> 323.1595;  $[\alpha]_{\text{D}}^{27}$   $-5.3$  ( $c$  0.95  $\text{CHCl}_3$ ).

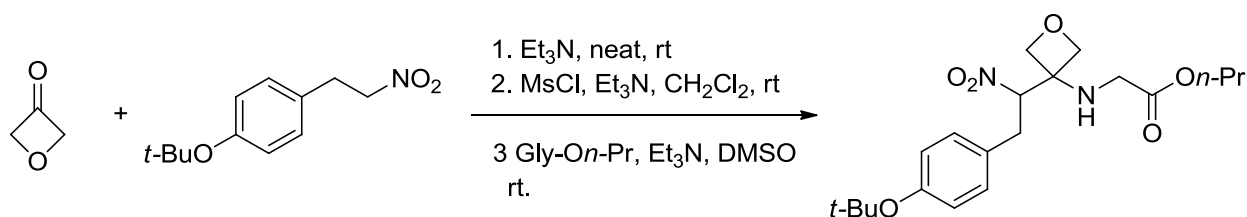

**General Procedure C: Conjugate addition of glycine propyl ester. The synthesis of propyl 2-((3-(2-(4-(tert-butoxy)phenyl)-1-nitroethyl)oxetan-3-yl)amino)acetate (47):** To a solution of 1-(tert-butoxy)-4-(2-nitroethyl)benzene (0.335 g, 1.50 mmol) in oxetan-3-one (0.147 mL, 2.250 mmol) was added Et<sub>3</sub>N (0.052 mL, 0.375 mmol). After stirring for 1 hour at room temperature, the reaction mixture was diluted with CH<sub>2</sub>Cl<sub>2</sub> (7 mL) and cooled to  $-78$  °C and then treated with MsCl (0.129 mL, 1.650 mmol) and Et<sub>3</sub>N (0.272 mL, 1.950 mmol). The resulting mixture was stirred for 30 min at  $-78$  °C and then allowed to warm to  $0$  °C over 60 minutes. After stirring for an additional 1 hour at  $0$  °C, the reaction mixture was diluted with EtOAc, washed with water, dried over Na<sub>2</sub>SO<sub>4</sub>, filtered and concentrated *in vacuo*. In a separate flask Et<sub>3</sub>N (0.63 mL, 4.50 mmol) was added to a solution of propyl 2-aminoacetate hydrochloride (0.691 g, 4.50 mmol), and in DMSO (4 mL), and the mixture stirred 10 minutes at room temperature. The resulting residue of the nitro compound was dissolved in DMSO (4 mL) and then added to the flask of propyl 2-aminoacetate in a dropwise manner via cannula. The flask of nitro compound was rinsed with 4 mL of DMSO. After stirring for 2 hours at room temperature the mixture was diluted with EtOAc (150 mL), and washed with water and brine, (75 mL each) the combined aqueous layers were then back-extracted with ether/EA ca. 3:1, the combined organics were then dried over Na<sub>2</sub>SO<sub>4</sub>, filtered and concentrated *in vacuo*. The resulting residue was purified by silica gel chromatography (17-22% EtOAc/hexanes) to afford nitro alkane **39** as a pale yellow solid (432 mg, 71% yield).

**Data for propyl 2-((3-(2-(4-(tert-butoxy)phenyl)-1-nitroethyl)oxetan-3-yl)amino)acetate (47):** <sup>1</sup>H NMR (300 MHz, CDCl<sub>3</sub>)  $\delta$  7.08 (d,  $J$  = 8.4 Hz, 2H), 6.89 (d,  $J$  = 8.4 Hz, 2H), 5.07 (dd,  $J$  = 9.5, 4.7 Hz, 1H), 4.73-4.53 (m, 2H), 4.41 (s, 2H), 4.09 (t,  $J$  = 6.7 Hz, 2H), 3.61 (q,  $J$  = 17.3 Hz, 2H), 3.34 (dd,  $J$  = 14.6, 9.5 Hz, 1H), 3.23 (dd,  $J$  = 14.6, 4.7 Hz, 1H), 2.46 (s, 1H), 1.68-1.61 (m, 2H), 1.29 (s, 9H), 0.92 (t,  $J$  = 7.4 Hz, 3H); <sup>13</sup>C NMR (75 MHz, CDCl<sub>3</sub>)  $\delta$  171.8, 154.6, 129.9, 129.2, 124.4, 92.7, 78.5, 77.6, 77.1, 66.9, 62.0, 44.5, 33.9, 28.9, 22.0, 10.4; IR (thin film, NaCl) 3338, 2977, 2884, 1731, 1555  $\text{cm}^{-1}$ ; HRMS (ESI, H)  $m/z$  calc'd for  $\text{C}_{20}\text{H}_{31}\text{N}_2\text{O}_6$  ( $\text{M} + \text{H}$ )<sup>+</sup> 395.2177, found 395.2178.



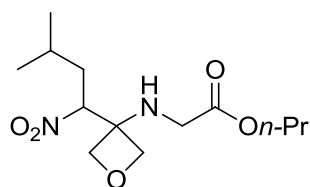

**Data for propyl 2-((3-(3-methyl-1-nitrobutyl)oxetan-3-yl)amino)acetate (46):** (pale yellow oil, 25-50% EtOAc/cyclohexane, 62% yield);  $^1\text{H}$  NMR (300 MHz,  $\text{CDCl}_3$ )  $\delta$  4.89 (d,  $J$  = 11.2 Hz, 1H), 4.67-4.43 (m, 4H), 4.08 (t,  $J$  = 6.7 Hz, 2H), 3.64 (dd,  $J$  = 17.3, 6.2 Hz, 1H), 3.50 (dd,  $J$  = 17.3, 5.6 Hz, 1H), 2.47-2.22 (m, 2H), 1.74-1.46 (m, 4H), 1.06-0.83 (m, 9H);  $^{13}\text{C}$  NMR (75 MHz,  $\text{CDCl}_3$ )  $\delta$  171.9, 89.4, 77.0, 67.0, 62.4, 44.7, 37.0, 25.7, 23.2, 22.1, 21.4, 10.5; IR (thin film, NaCl) 3342, 2964, 2878, 1738, 1557, 1463, 1372, 1205, 1132, 985, 852  $\text{cm}^{-1}$ ; HRMS (ESI, H)  $m/z$  calcd for  $\text{C}_{13}\text{H}_{25}\text{N}_2\text{O}_5$  ( $\text{M}+\text{H}$ ) $^+$  289.1758, found ( $\text{M}+\text{H}$ ) $^+$  289.1759.

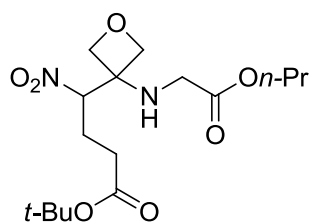

**Data for tert-butyl 4-nitro-4-(3-((2-oxo-2-propoxyethyl)amino)oxetan-3-yl)butanoate (48):** (colorless oil, 20% EtOAc/hex, 63% yield);  $^1\text{H}$  NMR (400 MHz,  $\text{CDCl}_3$ )  $\delta$  5.06-4.91 (m, 1H), 4.71 (d,  $J$  = 7.6 Hz, 1H), 4.68-4.49 (m, 3H), 4.11 (t,  $J$  = 6.7 Hz, 2H), 3.73-3.44 (m, 2H), 2.54-2.13 (m, 5H), 1.71-1.59 (m, 2H), 1.45 (s, 9H), 0.94-(t,  $J$  = 7.4 Hz, 3H);  $^{13}\text{C}$  NMR (100 MHz,  $\text{CDCl}_3$ )  $\delta$  172.2, 171.4, 90.4, 81.6, 77.3, 77.2, 67.2, 62.4, 44.8, 31.4, 28.3, 23.9, 22.1, 10.5; IR (thin film, NaCl) 3338, 2972, 2884, 1731, 1555, 1368, 1210, 1155, 985, 845  $\text{cm}^{-1}$ ; HRMS (ESI, TOF-MS)  $m/z$  calcd for:  $\text{C}_{16}\text{H}_{29}\text{N}_2\text{O}_7$  ( $\text{M}+\text{H}$ ) $^+$  361.1969; found ( $\text{M}+\text{H}$ ) $^+$  361.1976.

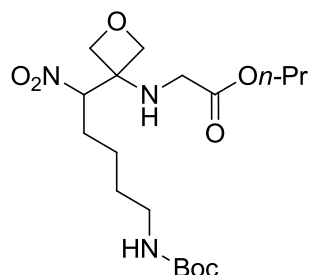

**propyl 2-((3-(5-((tert-butoxycarbonyl)amino)-1-nitropentyl)oxetan-3-yl)amino)acetate (49):** (light yellow oil, 35% EtOAc/hexanes, 89% yield);  $^1\text{H}$  NMR (400 MHz,  $\text{CDCl}_3$ )  $\delta$  4.81 (dd,  $J$  = 11.1, 2.9 Hz, 1H), 4.70-4.47 (m, 5H), 4.11 (t,  $J$  = 6.7 Hz, 2H), 3.74-3.46 (m, 2H), 3.24-3.01 (m, 2H), 2.40-2.23 (m, 2H), 1.99-1.87 (m, 1H), 1.75-1.32 (m, 15H), 0.95 (t,  $J$  = 7.4 Hz, 3H);  $^{13}\text{C}$  NMR (100 MHz,  $\text{CDCl}_3$ )  $\delta$  172.3, 156.2, 91.6, 79.5, 67.3, 62.4, 44.8, 40.1, 29.7, 28.6, 28.1, 23.8, 22.1,

10.6; IR (thin film, NaCl) 3340, 2971, 1736, 1701, 1552, 1520, 1364, 1249, 1171, 980 896  $\text{cm}^{-1}$ ; HRMS (ESI, TOF-MS)  $m/z$  calcd for:  $\text{C}_{18}\text{H}_{34}\text{N}_3\text{O}_7$  ( $\text{M}+\text{H}$ ) $^+$  404.2391; found ( $\text{M}+\text{H}$ ) $^+$  404.2397.

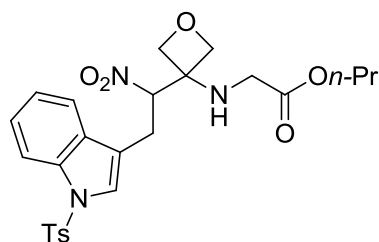

**Data for propyl 2-((3-(1-nitro-2-(1-tosyl-1H-indol-3-yl)ethyl)oxetan-3-yl)amino)acetate (50):** (pale brown solid, 25% EtOAc/hexanes, 63% yield);  $^1\text{H}$  NMR (300 MHz,  $\text{CDCl}_3$ )  $\delta$  7.96 (d,  $J = 8.4$  Hz, 1H), 7.68 (d,  $J = 8.4$  Hz, 2H), 7.47-7.45 (m, 2H), 7.31-7.11 (m, 4H), 5.18 (dd,  $J = 10.0, 4.2$  Hz, 1H), 4.63 (s, 2H), 4.47 (q,  $J = 7.8$  Hz, 2H), 4.14-3.39 (m, 3H), 3.67-3.59 (m, 2H), 3.37 (dd,  $J = 15.4, 4.1$  Hz, 1H), 2.50 (s (br), 1H), 2.28 (s, 3H), 1.70-1.61 (m, 2H), 0.94 (t,  $J = 7.3$  Hz, 3H);  $^{13}\text{C}$  NMR (75 MHz,  $\text{CDCl}_3$ )  $\delta$  171.9, 145.0, 135.0, 134.7, 129.8, 129.7, 126.6, 125.1, 124.7, 123.4, 118.7, 116.3, 113.9, 90.5, 77.6, 77.1, 67.0, 62.2, 44.6, 24.3, 22.0, 21.6, 10.4; IR (thin film, NaCl) 3329, 2975, 2879, 1738, 1552, 1167  $\text{cm}^{-1}$ ; HRMS (ESI, H)  $m/z$  calc'd for  $\text{C}_{25}\text{H}_{30}\text{N}_3\text{O}_7\text{S}$  ( $\text{M} + \text{H}$ ) $^+$  516.1799, found 516.1799.

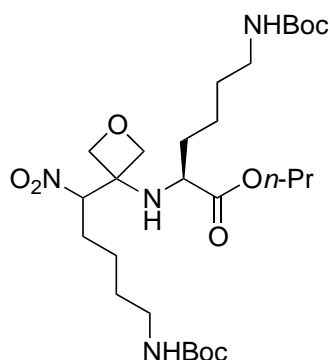

**Data for (2S)-propyl 6-((tert-butoxycarbonyl)amino)-2-((3-(5-((tert-butoxycarbonyl)amino)-1-nitropentyl)oxetan-3-yl)amino)hexanoate (51):** (pale yellow oil, 40% EtOAc/hexanes, 81% yield);  $^1\text{H}$  NMR (400 MHz,  $\text{CDCl}_3$ )  $\delta$  4.86-4.74 (m, 2H), 4.73-4.65 (m, 1H), 4.65-4.38 (m, 11H), 4.10-4.02 (m, 4H), 3.72-3.61 (m, 1H), 3.56-3.48 (m, 1H), 3.20-3.00 (m, 8H), 2.52-2.46 (m, 1H), 2.39-2.21 (m, 2H), 2.20-2.12 (m, 1H), 2.00-1.81 (m, 2H), 1.72-1.23 (m, 60H), 0.99-0.88 (m, 6H);  $^{13}\text{C}$  NMR (75 MHz,  $\text{CDCl}_3$ )  $\delta$  176.0, 156.2, 92.9, 90.6, 79.5, 79.3, 78.3, 78.2, 77.7, 77.4, 67.3, 67.2, 62.5, 62.4, 55.6, 40.5, 40.4, 40.1, 34.8, 34.3, 30.0, 29.7, 28.6, 28.2, 27.8, 24.0, 23.8, 23.2, 22.9, 22.1, 10.6, 10.5; IR (thin film, NaCl) 3349, 2970, 2875, 1699, 1551, 1519, 1365, 1248, 1173, 983  $\text{cm}^{-1}$ ; HRMS (ESI, H)  $m/z$  calcd for:  $\text{C}_{27}\text{H}_{51}\text{N}_4\text{O}_9$  ( $\text{M}+\text{H}$ ) $^+$  575.3651, found ( $\text{M}+\text{H}$ ) $^+$  575.3650.

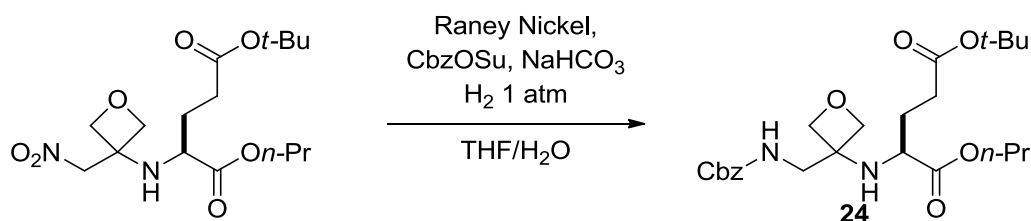

**General Procedure D: Nitro group reduction and Cbz protection.** The synthesis of **(S)-5-tert-butyl 1-propyl 2-((3-((benzyloxy)carbonyl)amino)methyl)oxetan-3-yl)amino)pentanedioate (24)**: To a solution of **(S)-5-tert-butyl 1-propyl 2-((3-(nitromethyl)oxetan-3-yl)amino)pentanedioate** (0.210 g, 0.583 mmol), benzyl (2,5-dioxopyrrolidin-1-yl) carbonate (0.218 g, 0.874 mmol) and NaHCO<sub>3</sub> (0.146 g, 1.75 mmol) in THF (5.8 mL) was added Raney-Nickel (500 mg, 50% slurry in water, ca. 1.0 mL) at room temperature. The reaction was then stirred for 2 hours under a H<sub>2</sub> atmosphere. After completion was confirmed by TLC, the catalyst was removed by filtration through celite and washing with EtOAc (100 mL). The filtrate was then diluted with water (75 mL) and extracted with EtOAc (3x 75 mL), the combined organics were then dried over Na<sub>2</sub>SO<sub>4</sub>, filtered and concentrated *in vacuo*. The resulting residue was purified by silica gel chromatography (50% EtOAc/hexanes) to afford protected amine **24** as a colorless oil (170 mg, 63%).

**Data for (S)-5-tert-butyl 1-propyl 2-((3-((benzyloxy)carbonyl)amino)methyl)oxetan-3-yl)amino)pentanedioate (24)**: <sup>1</sup>H NMR (300 MHz, C<sub>6</sub>D<sub>6</sub>) δ 7.28 (d, *J* = 7.1 Hz, 2H), 7.19-7.10 (m, 3H), 5.52 (t, *J* = 5.5 Hz, 1H), 5.12 (s, 2H), 4.35 (d, *J* = 6.2 Hz, 1H), 4.21 (s, 3H), 3.77 (td, *J* = 6.7, 2.2 Hz, 2H), 3.60 (dd, *J* = 14.0, 6.0 Hz, 1H), 3.42 (dd, *J* = 13.9, 5.6 Hz, 1H), 3.31 (dd, *J* = 8.7, 4.6 Hz, 1H), 2.25-2.19 (m, 2H), 2.03-1.80 (m, 2H), 1.76-1.58 (m, 1H), 1.34 (s, 9H), 1.31-1.24 (m, 2H), 0.65 (d, *J* = 7.4 Hz, 3H); <sup>13</sup>C NMR (75 MHz, C<sub>6</sub>D<sub>6</sub>) δ 175.8, 172.0, 157.0, 137.2, 128.4, 128.3, 127.9, 79.9, 79.3, 79.0, 66.7, 66.6, 59.9, 54.8, 45.6, 31.8, 29.7, 28.0, 22.1, 10.3; IR (thin film, NaCl) 3331, 2970, 2878, 1721, 1257, 1148, 976, 750 cm<sup>-1</sup>; HRMS (ESI, H) *m/z* calc'd for C<sub>24</sub>H<sub>37</sub>N<sub>2</sub>O<sub>7</sub> (M + H)<sup>+</sup> 465.2595, found 465.2583; [α]<sub>D</sub><sup>23</sup> -1.70 (*c* 0.50, CHCl<sub>3</sub>).

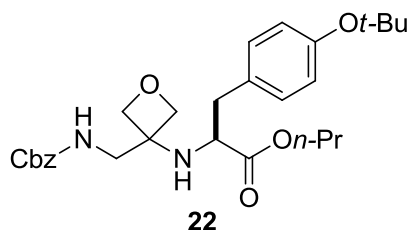

**Data for (S)-propyl 2-((3-((benzyloxy)carbonyl)amino)methyl)oxetan-3-yl)amino)-3-(4-(tert-butoxy)phenyl)propanoate (22)**: (colorless oil, 17% acetone/hexanes, 82% yield); <sup>1</sup>H NMR (300 MHz, CDCl<sub>3</sub>) δ 7.40-7.26 (m, 5H), 7.07 (d, *J* = 8.4 Hz, 2H), 6.90 (d, *J* = 8.4 Hz, 2H), 5.13-5.03 (m, 3H), 4.29-4.21 (m, 2H), 4.20-4.12 (m, 2H), 4.01 (td, *J* = 6.7, 1.5 Hz, 2H), 3.56-3.37 (m, 3H), 2.94 (dd, *J* = 13.4, 5.5 Hz, 1H), 2.85-2.57 (m, 1H), 2.05 (s (br), 1H), 1.87-

1.47 (m, 2H), 1.30 (s, 9H), 0.80 (t,  $J = 7.4$  Hz, 3H);  $^{13}\text{C}$  NMR (75 MHz,  $\text{CDCl}_3$ )  $\delta$  175.1, 156.4, 154.0, 149.2, 136.3, 131.7, 129.5, 128.3, 127.9, 124.1, 79.6, 79.3, 78.4, 67.0, 66.8, 59.4, 57.6, 45.1, 40.2, 29.0, 22.0, 10.6; IR (thin film, NaCl) 3331, 2973, 2877, 1721, 1505, 1159, 976, 895, 750  $\text{cm}^{-1}$ ; HRMS (ESI, H)  $m/z$  calc'd for  $\text{C}_{28}\text{H}_{39}\text{N}_2\text{O}_6$  ( $\text{M} + \text{H}$ ) $^+$  499.2803, found 499.2813;  $[\alpha]_{\text{D}}^{25} -6.23$  (c 0.50,  $\text{CHCl}_3$ ).

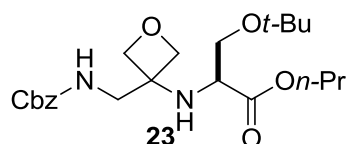

**Data for (S)-propyl 2-((3-(((benzyloxy)carbonyl)amino)methyl)oxetan-3-yl)amino)-3-(tert-butoxy)propanoate (23):** (colorless oil, 9-33% acetone/hexanes, 76% yield);  $^1\text{H}$  NMR (300 MHz,  $\text{CDCl}_3$ )  $\delta$  7.29 (m, 5H), 5.64 (t,  $J = 5.2$  Hz, 1H), 5.09 (s, 2H), 4.45-4.39 (m, 4H), 4.06 (t,  $J = 6.7$  Hz, 2H), 3.59 (d,  $J = 5.6$  Hz, 2H), 3.53-3.36 (m, 3H), 2.31 (s (br), 1H), 1.79-1.52 (m, 2H), 1.14 (s, 9H), 0.92 (t,  $J = 7.4$  Hz, 3H);  $^{13}\text{C}$  NMR (75 MHz,  $\text{CDCl}_3$ )  $\delta$  173.5, 156.6, 136.4, 128.3, 128.0, 127.9, 80.4, 80.0, 73.7, 67.0, 66.7, 63.8, 59.3, 56.5, 44.7, 27.4, 22.0, 10.5; IR (thin film, NaCl) 3339, 2971, 2876, 1715, 1259, 764, 7500  $\text{cm}^{-1}$ ; HRMS (ESI, H)  $m/z$  calc'd for  $\text{C}_{22}\text{H}_{35}\text{N}_2\text{O}_6$  ( $\text{M} + \text{H}$ ) $^+$  423.2490, found 423.2492;  $[\alpha]_{\text{D}}^{24} -4.98$  (c 0.50,  $\text{CHCl}_3$ ).

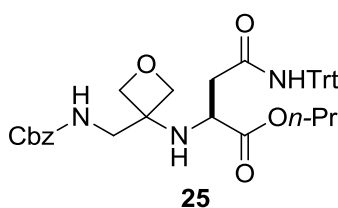

**Data for (S)-propyl 2-((3-(((benzyloxy)carbonyl)amino)methyl)oxetan-3-yl)amino)-4-oxo-4-(tritylamino)butanoate (25):** (white solid, 20% acetone/hexanes, 72% yield);  $^1\text{H}$  NMR (300 MHz,  $\text{CDCl}_3$ )  $\delta$  7.45 (s, 1H), 7.28-7.19 (m, 19H), 5.65 (t,  $J = 5.4$  Hz, 1H), 5.01 (q,  $J = 12.3$  Hz, 2H), 4.41 (m, 3H), 4.11 (d,  $J = 6.6$  Hz, 1H), 4.03 (qt,  $J = 10.7, 5.3$  Hz, 2H), 3.87 (d,  $J = 6.9$  Hz, 1H), 3.62 (qd,  $J = 14.2, 5.9$  Hz, 2H), 2.63 (dd,  $J = 14.9, 3.5$  Hz, 1H), 2.49 (dd,  $J = 14.8, 9.7$  Hz, 2H), 1.86 (s (br), 1H), 1.71-1.48 (m, 2H), 0.92 (t,  $J = 7.4$  Hz, 3H);  $^{13}\text{C}$  NMR (75 MHz,  $\text{CDCl}_3$ )  $\delta$  174.7, 168.6, 157.1, 144.2, 136.3, 128.6, 128.3, 127.9, 127.8, 126.9, 79.8, 79.4, 70.8, 67.3, 66.7, 59.7, 52.6, 45.0, 41.1, 21.9, 10.5; IR (thin film, NaCl) 3317, 2966, 2868, 2361, 1718, 1667, 1519, 1259, 750, 697  $\text{cm}^{-1}$ ; HRMS (ESI, H)  $m/z$  calc'd for  $\text{C}_{38}\text{H}_{42}\text{N}_3\text{O}_6$  ( $\text{M} + \text{H}$ ) $^+$  636.3068, found 636.3067;  $[\alpha]_{\text{D}}^{27} -22.8$  (c 0.50,  $\text{CHCl}_3$ ).

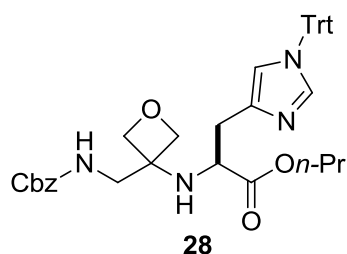

**Data for (S)-propyl 2-((3-(((benzyloxy)carbonyl)amino)methyl)oxetan-3-yl)amino)-3-(1-trityl-1H-imidazol-4-yl)propanoate (28):** (colorless oil, 17-50% acetone/hexanes, 49% yield);  $^1\text{H}$  NMR (300 MHz,  $\text{CDCl}_3$ )  $\delta$  7.40 (s, 1H), 7.35-7.21 (m, 14H), 7.11-7.08 (m, 6H), 6.59 (s, 1H), 6.27 (t,  $J = 5.4$  Hz, 1H), 5.02 (s, 2H), 4.35-4.31 (m, 2H), 4.27 (d,  $J = 6.4$  Hz, 1H), 4.21 (d,  $J = 6.4$  Hz, 1H), 4.00 (td,  $J = 6.7, 1.5$  Hz, 2H), 3.69-3.51 (m, 3H), 2.95 (dd,  $J = 14.5, 3.8$  Hz, 1H), 2.72 (dd,  $J = 14.5, 9.2$  Hz, 1H), 2.17 (s (br), 1H), 1.75-1.46 (m, 2H), 0.89 (t,  $J = 7.4$  Hz, 3H);  $^{13}\text{C}$  NMR (75 MHz,  $\text{CDCl}_3$ )  $\delta$  175.0, 156.9, 142.1, 138.7, 136.6, 129.6, 128.3, 127.9, 127.7, 119.6, 80.3, 80.0, 75.3, 66.9, 66.4, 59.5, 55.6, 32.3, 21.9, 10.5; IR (thin film, NaCl) 3322, 2965, 2875, 1715, 1493, 1445, 1235, 748, 699  $\text{cm}^{-1}$ ; HRMS (ESI, H)  $m/z$  calc'd for  $\text{C}_{40}\text{H}_{43}\text{N}_4\text{O}_5$  ( $\text{M} + \text{H}$ ) $^+$  659.3228, found 659.3210;  $[\alpha]_{\text{D}}^{26} +8.28$  (c 0.10,  $\text{CHCl}_3$ ).

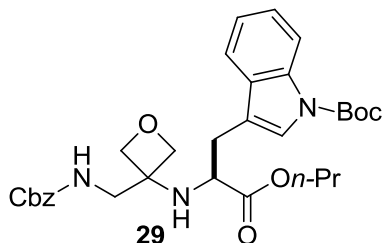

**Data for (S)-tert-butyl 3-(2-((3-(((benzyloxy)carbonyl)amino)methyl)oxetan-3-yl)amino)-3-oxo-3-propoxypropyl)-1H-indole-1-carboxylate (29):** (colorless oil, 25-33% EtOAc/hexanes, 69%);  $^1\text{H}$  NMR (300 MHz,  $\text{C}_6\text{D}_6$ )  $\delta$  8.45 (s, 1H), 7.77-7.47 (m, 2H), 7.33-6.99 (m, 7H), 5.15-5.00 (m, 3H), 4.26 (d,  $J = 6.4$  Hz, 1H), 4.10 (d,  $J = 5.2$  Hz, 2H), 4.02 (d,  $J = 6.5$  Hz, 1H), 3.82-3.61 (m, 3H), 3.54 (dd,  $J = 13.9, 6.3$  Hz, 1H), 3.25 (dd,  $J = 13.9, 5.2$  Hz, 1H), 2.96 (dd,  $J = 14.3, 6.2$  Hz, 1H), 2.81 (d,  $J = 14.1, 7.2$  Hz, 1H), 2.09 (s (br), 1H), 1.36 (s, 9H), 1.24 (dq,  $J = 14.1, 7.1$  Hz, 2H), 0.57 (t,  $J = 7.4$  Hz, 3H);  $^{13}\text{C}$  NMR (75 MHz,  $\text{C}_6\text{D}_6$ )  $\delta$  175.4, 156.7, 149.5, 137.2, 135.9, 130.7, 128.4, 128.3, 127.9, 124.7, 124.3, 122.8, 119.2, 116.4, 115.7, 83.0, 79.1, 79.0, 66.7, 59.8, 56.1, 45.5, 30.6, 27.9, 22.0, 10.3; IR (thin film, NaCl) 3331, 2968, 2868, 2360, 1723, 1154, 747  $\text{cm}^{-1}$ ; HRMS (ESI, H)  $m/z$  calc'd for  $\text{C}_{31}\text{H}_{40}\text{N}_3\text{O}_7$  ( $\text{M} + \text{H}$ ) $^+$  566.2861, found 566.2857;  $[\alpha]_{\text{D}}^{25} +4.00$  (c 0.25,  $\text{CHCl}_3$ ).

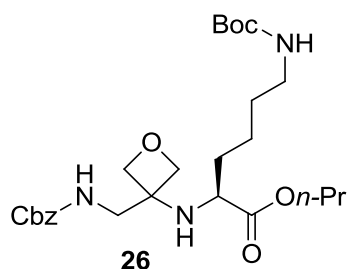

**Data for (S)-propyl 2-((3-(((benzyloxy)carbonyl)amino)methyl)oxetan-3-yl)amino)-6-((tert-butoxycarbonyl)amino)hexanoate (26):** (colorless oil, 40-45-50% EtOAc/hexanes, 57% yield);  $^1\text{H}$  NMR (400 MHz,  $\text{C}_6\text{D}_6$ )  $\delta$  7.40–7.20 (m, 1H), 7.20–6.97 (m, 4H), 5.24 (s, (br) 1H), 5.13 (s, 2H), 4.35 (d,  $J = 6.3$  Hz, 1H), 4.30–4.04 (m, 4H), 3.85–3.74 (m, 2H), 3.66 (dd,  $J = 13.8, 6.4$  Hz, 1H), 3.32 (dd,  $J = 13.8, 5.1$  Hz, 1H), 3.14 (s (br) 1H), 2.90 (s (br) 2H), 1.89 (s (br), 1H), 1.53–1.23 (m, 13H), 1.22–0.98 (m, 4H), 0.68 (t,  $J = 7.4$  Hz, 3H);  $^{13}\text{C}$  NMR (100 MHz,  $\text{C}_6\text{D}_6$ )  $\delta$  177.6, 176.9, 157.7, 156.5, 138.0, 80.1, 79.7, 79.1, 67.5, 67.2, 60.5, 56.2, 46.4, 40.9, 34.8, 30.6, 29.9, 29.1, 23.6, 22.7, 11.0; IR (thin film, NaCl) 3336, 2968, 2935, 1713, 1522, 1248, 1173, 978  $\text{cm}^{-1}$ ; HRMS (ESI, TOF-MS)  $m/z$  calcd for:  $\text{C}_{26}\text{H}_{42}\text{N}_3\text{O}_7$  ( $\text{M}+\text{H}$ ) $^+$  508.3017; found ( $\text{M}+\text{H}$ ) $^+$  508.3012;  $[\alpha]_{\text{D}}^{20}$  0.584 (c 1.00,  $\text{CHCl}_3$ ).

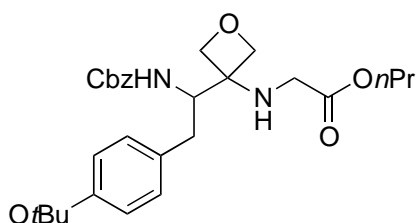

**Data for propyl 2-((3-(1-(((benzyloxy)carbonyl)amino)-2-(4-(tert-butoxy)phenyl)ethyl)oxetan-3-yl)amino)acetate (53):** (colorless oil, 40% EtOAc/Hex, 43% yield);  $^1\text{H}$  NMR (300 MHz,  $\text{CDCl}_3$ )  $\delta$  7.37–7.26 (m, 5H), 7.13 (d,  $J = 8.2$  Hz, 2H), 6.89 (d,  $J = 8.3$  Hz, 2H), 5.28 (d,  $J = 9.2$  Hz, 1H), 5.04 (s, 2H), 4.49–4.38 (m, 3H), 4.22–4.05 (m, 4H), 3.70 (q,  $J = 17.5$  Hz, 2H), 2.79 (d,  $J = 6.8$  Hz, 2H), 2.03 (s (br), 1H), 1.69 (dd,  $J = 14.2, 6.9$  Hz, 2H), 1.31 (s, 9H), 0.96 (t,  $J = 7.4$  Hz, 3H);  $^{13}\text{C}$  NMR (75 MHz,  $\text{CDCl}_3$ )  $\delta$  172.6, 156.1, 154.0, 136.2, 132.1, 129.4, 128.4, 128.0, 127.8, 124.3, 78.4, 78.3, 77.6, 67.0, 66.8, 62.6, 57.4, 44.7, 35.6, 28.9, 22.0, 10.5; IR (thin film, NaCl) 3351, 2973, 1725, 1153, 747  $\text{cm}^{-1}$ ; HRMS (ESI, H)  $m/z$  calc'd for  $\text{C}_{28}\text{H}_{39}\text{N}_2\text{O}_6$  ( $\text{M} + \text{H}$ ) $^+$  499.2803, found 499.2805.

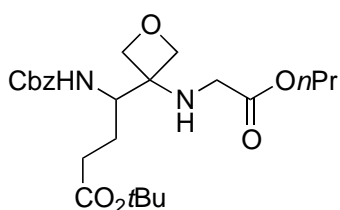

**tert-butyl 4-(((benzyloxy)carbonyl)amino)-4-(3-((2-oxo-2-propoxyethyl)amino)oxetan-3-**

**yl)butanoate (54):** (colorless oil, 25-35% EtOAc/hexanes, 55% yield);  $^1\text{H}$  NMR (400 MHz,  $\text{C}_6\text{D}_6$ )  $\delta$  7.31-7.18 (m, 2H), 7.17-6.97 (m, 3H), 5.18-4.92 (m, 3H), 4.50-4.10 (m, 5H), 3.86 (t,  $J = 6.7$  Hz, 2H), 3.42-3.19 (m, 2H), 2.32-2.12 (m, 2H), 1.77-1.59 (m, 2H), 1.47-1.14 (m, 12H), 0.69 (t,  $J = 7.4$  Hz, 3H);  $^{13}\text{C}$  NMR (100 MHz,  $\text{C}_6\text{D}_6$ )  $\delta$  172.9, 172.6, 157.3, 137.6, 128.9, 128.7, 80.3, 77.9, 77.3, 67.1, 66.7, 63.4, 55.7, 45.1, 32.4, 28.4, 25.0, 22.4, 10.6; IR (thin film, NaCl) 3324, 2973, 2879, 1826, 1533, 1365, 1250, 1154, 742  $\text{cm}^{-1}$ ; HRMS (ESI, TOF-MS)  $m/z$  calcd for:  $\text{C}_{24}\text{H}_{37}\text{N}_2\text{O}_7$  ( $\text{M}+\text{H}$ ) $^+$  465.2595; found ( $\text{M}+\text{H}$ ) $^+$  465.2589.

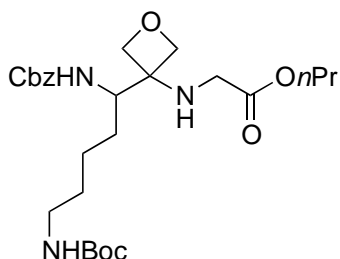

**Data for propyl 2-((3-((13,13-dimethyl-3,11-dioxo-1-phenyl-2,12-dioxo-4,10-diazatetradecan-5-yl)oxetan-3-yl)amino)acetate (55):** (colorless oil, 20-30-40% EtOAc/hexanes, 64% yield)  $^1\text{H}$  NMR (400 MHz,  $\text{CDCl}_3$ )  $\delta$  7.26 (d,  $J = 7.0$  Hz, 2H), 7.22-7.00 (m, 3H), 5.25-4.97 (m, 3H), 4.50 (d,  $J = 7.1$  Hz, 1H), 4.32-4.07 (m, 5H), 3.89 (t,  $J = 6.7$  Hz, 2H), 3.36 (dd,  $J = 32.4, 8.4$  Hz, 2H), 2.91 (s (br), 2H), 1.71 (m, 1H), 1.55-1.27 (m, 11H), 1.28-0.83 (m, 6H), 0.70 (t,  $J = 7.4$  Hz, 3H);  $^{13}\text{C}$  NMR (100 MHz,  $\text{CDCl}_3$ )  $\delta$  173.4, 157.7, 156.6, 138.1, 129.8, 79.0, 78.4, 77.6, 67.5, 67.2, 63.8, 56.6, 45.5, 40.1, 30.4, 29.6, 29.2, 24.2, 22.8, 11.0; IR (thin film, NaCl) 3340, 2864, 2934, 2875, 1711, 1527, 1245, 1168, 979, 737, 698  $\text{cm}^{-1}$ ;  $\text{C}_{26}\text{H}_{42}\text{N}_3\text{O}_7$  ( $\text{M}+\text{H}$ ) $^+$  508.3017; found ( $\text{M}+\text{H}$ ) $^+$  508.3008.

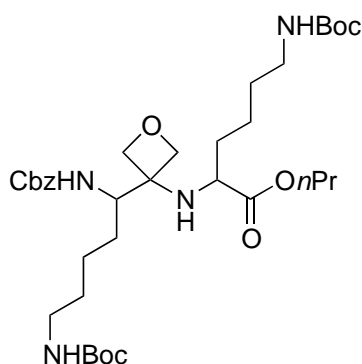

**(2S)-propyl 6-((tert-butoxycarbonyl)amino)-2-((3-((13,13-dimethyl-3,11-dioxo-1-phenyl-2,12-dioxo-4,10-diazatetradecan-5-yl)oxetan-3-yl)amino)hexanoate (57):** (colorless gum, 25-30-35-40% EtOAc/hexanes, 55% yield);  $^1\text{H}$  NMR (400 MHz,  $\text{C}_6\text{D}_6$ )  $\delta$  7.32-7.21 (m, 4H), 7.19-7.04 (m, 6H), 5.52-5.35 (m, 1H), 5.25-5.01 (m, 5H), 4.70-4.57 (m, 2H), 4.53-4.18 (10H), 3.93-3.84 (m, 4H), 3.73-3.53 (m, 2H), 3.03-2.80 (m, 8H), 1.62-1.01 (m, 66H), 0.78-0.63 (m, 6H);  $^{13}\text{C}$  NMR (100 MHz,  $\text{C}_6\text{D}_6$ )  $\delta$  177.1, 158.0, 157.8, 156.7, 156.6, 156.5, 138.2, 138.1, 129.3,

79.3, 79.0, 78.3, 67.5, 67.4, 64.2, 56.8, 56.6, 56.1, 41.1, 41.0, 35.5, 35.3, 30.8, 30.6, 30.4, 29.6, 29.4, 29.2, 24.3, 24.2, 23.9, 23.8, 22.8, 11.0; IR (thin film, NaCl) 3338, 2972, 2935, 2876, 1703, 1524, 1454, 1365, 1250, 1171, 980  $\text{cm}^{-1}$ ; HRMS (ESI, H)  $m/z$  calc'd for  $\text{C}_{35}\text{H}_{59}\text{N}_4\text{O}_9$  ( $\text{M} + \text{H}$ )<sup>+</sup> 679.4277, found 679.4278.

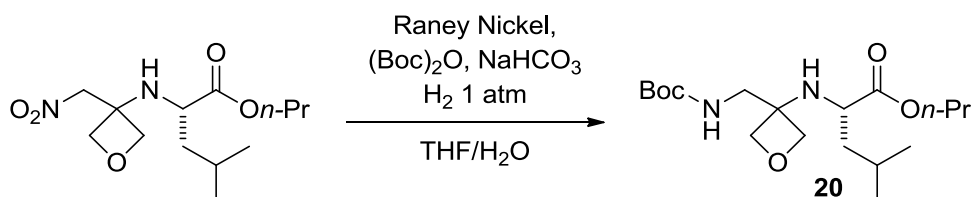

**General Procedure E: Nitro group reduction and Boc protection. The synthesis of (S)-Propyl 2-((3-(((tert-butoxycarbonyl)amino)methyl)oxetan-3-yl)amino)-4-methylpentanoate (20):** To a solution of (S)-propyl 1-(3-(nitromethyl)oxetan-3-yl)pyrrolidine-2-carboxylate (0.250 g, 0.918 mmol), and  $(\text{Boc})_2\text{O}$  (0.256 mL, 1.102 mmol) in THF (10 mL) was added  $\text{NaHCO}_3$  (0.154 g, 1.836 mmol) and Raney Nickel (500 mg, 50% slurry in water, ca. 1 mL). The reaction was then stirred at room temperature for 3 hours under an atmosphere of  $\text{H}_2$ . After completion was confirmed by TLC, the catalyst was removed by filtration through celite and washing with EtOAc (100 mL). The filtrate was then diluted with water (75 mL) and extracted with EtOAc (3x 75 mL), the combined organics were then dried over  $\text{Na}_2\text{SO}_4$ , filtered and concentrated *in vacuo*. The residue was purified by silica gel chromatography (5-20% EtOAc/hexanes) to afford protected amine **20** as a colorless oil (256 mg, 78%).

**Data for (S)-Propyl 2-((3-(((tert-butoxycarbonyl)amino)methyl)oxetan-3-yl)amino)-4-methylpentanoate (20):**  $^1\text{H}$  NMR (300 MHz,  $\text{CDCl}_3$ )  $\delta$  4.76 (s (br), 1H), 4.56-4.31 (m, 5H), 4.16-4.06 (m, 3H), 3.68 (d,  $J = 17.7$  Hz, 1H), 3.59 (d,  $J = 17.6$  Hz, 1H), 1.90 (s (br), 1H), 1.75-1.60 (m, 3H), 1.47 (s (br), 1H), 1.42 (s, 9H), 1.03-0.84 (m, 9H);  $^{13}\text{C}$  NMR (75 MHz,  $\text{CDCl}_3$ )  $\delta$  176.7, 156.2, 79.9, 79.5, 66.9, 59.6, 54.1, 44.9, 43.9, 28.5, 24.9, 23.0, 22.3, 22.1, 10.6; IR (thin film, NaCl) 2964, 2878, 1716, 1506, 1390, 1368, 1248, 1175, 977  $\text{cm}^{-1}$ ; HRMS (ESI, H)  $m/z$  calcd for: calculated for  $\text{C}_{18}\text{H}_{35}\text{N}_2\text{O}_5$  ( $\text{M} + \text{H}$ )<sup>+</sup> 359.2540, found ( $\text{M} + \text{H}$ )<sup>+</sup> 359.2539;  $[\alpha]_{\text{D}}^{27} -3.8$  ( $c = 1.30$ ,  $\text{CHCl}_3$ ).

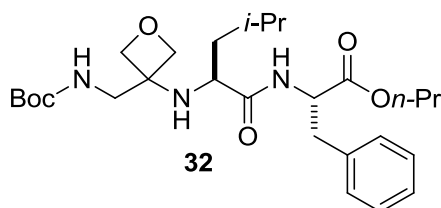

**(S)-propyl 2-((S)-2-((3-(((tert-butoxycarbonyl)amino)methyl)oxetan-3-yl)amino)-4-methylpentanamido)-3-phenylpropanoate (32):** (colorless oil, 33-50% EtOAc/hexanes, 78% yield);  $^1\text{H}$  NMR (300 MHz,  $\text{CDCl}_3$ )  $\delta$  7.38 (d,  $J = 8.3$  Hz, 1H), 7.30-7.18 (m, 3H), 7.15-7.08 (m,



2H), 5.36 (s (br), 1H), 4.84 (td,  $J = 8.1, 5.7$  Hz, 1H), 4.40 (d,  $J = 6.6$  Hz, 1H), 4.32 (d,  $J = 6.9$  Hz, 1H), 4.28 (d,  $J = 6.7$  Hz, 1H), 4.23 (d,  $J = 6.9$  Hz, 1H), 4.07 (t,  $J = 6.7$  Hz, 2H), 3.53 (dd,  $J = 14.2, 7.3$  Hz, 1H), 3.34-3.21 (m, 2H), 3.17 (dd,  $J = 13.9, 5.6$  Hz, 1H), 2.97 (dd,  $J = 13.9, 7.8$  Hz, 1H), 1.76 (s (br), 1H), 1.70-1.53 (m, 3H), 1.43 (s, 9H), 1.40-1.31 (m, 1H), 1.25-1.13 (m, 1H), 0.92-0.85 (m, 9H);  $^{13}\text{C}$  NMR (75 MHz,  $\text{CDCl}_3$ )  $\delta$  174.9, 171.9, 156.6, 135.8, 129.0, 128.4, 126.9, 79.4, 78.8, 78.7, 67.2, 60.5, 55.7, 52.4, 45.8, 44.0, 38.2, 28.4, 24.8, 23.2, 22.1, 21.9, 10.4; IR (thin film, NaCl) 3319, 2959, 2873, 2361, 1658, 1512, 1167  $\text{cm}^{-1}$ ; HRMS (ESI, H)  $m/z$  calc'd for  $\text{C}_{27}\text{H}_{44}\text{N}_3\text{O}_6$  ( $\text{M} + \text{H}$ ) $^+$  506.3225, found 506.3219;  $[\alpha]_{\text{D}}^{28} +10.6$  (c 0.40,  $\text{CHCl}_3$ ).

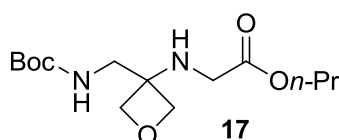

**Data for Propyl 2-((3-(((tert-butoxycarbonyl)amino)methyl)oxetan-3-yl)amino)acetate (17):** (colorless oil, 9-25% MTBE/ $\text{CH}_2\text{Cl}_2$ , 62% yield);  $^1\text{H}$  NMR (300 MHz,  $\text{CDCl}_3$ )  $\delta$  5.07 (s (br), 1H), 4.46 (d,  $J = 6.7$  Hz, 2H), 4.37 (d,  $J = 6.7$  Hz, 2H), 4.09 (t,  $J = 6.7$  Hz, 2H), 3.48 (d,  $J = 5.6$  Hz, 2H), 3.43 (s, 2H), 2.04 (s (br), 1H), 1.73-1.58 (m, 2H), 1.43 (s, 9H), 0.93 (t,  $J = 7.4$  Hz, 3H);  $^{13}\text{C}$  NMR (75 MHz,  $\text{CDCl}_3$ )  $\delta$  172.4, 156.3, 79.6, 79.3, 67.0, 59.7, 44.8, 44.7, 28.8, 28.6, 22.1, 10.6; IR (thin film, NaCl) 3338, 2967, 2879, 1739, 1712, 1514, 1391, 1364, 1245, 1175, 977  $\text{cm}^{-1}$ ; HRMS (ESI, H)  $m/z$  calcd for:  $\text{C}_{14}\text{H}_{27}\text{N}_2\text{O}_5$  ( $\text{M}+\text{H}$ ) $^+$  303.1914, found ( $\text{M}+\text{H}$ ) $^+$  303.1920.

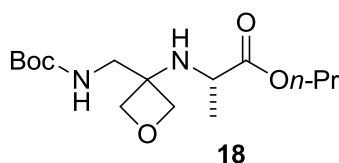

**Data for (S)-Propyl 2-((3-(((tert-butoxycarbonyl)amino)methyl)oxetan-3-yl)amino)propanoate (18):** (colorless oil, 9-25% MTBE/ $\text{CH}_2\text{Cl}_2$ , 76% yield);  $^1\text{H}$  NMR (300 MHz,  $\text{CDCl}_3$ )  $\delta$  4.99 (s (br), 1H), 4.47-4.26 (m, 4H), 4.05 (t,  $J = 6.8$  Hz, 2H), 3.67-3.55 (m, 1H), 3.49-3.32 (m, 2H), 2.08 (s (br), 1H), 1.72-1.57 (m, 2H), 1.54 (s, 9H), 1.30 (d,  $J = 7.0$  Hz, 3H), 0.93 (t,  $J = 7.4$  Hz, 3H);  $^{13}\text{C}$  NMR (75 MHz,  $\text{CDCl}_3$ )  $\delta$  176.3, 156.3, 80.1, 80.0, 79.6, 67.0, 59.7, 51.2, 44.7, 28.5, 22.1, 21.0, 10.6; IR (thin film, NaCl) 3325, 2964, 2930, 2878, 1712, 1510, 1450, 1390, 1364, 1248, 1171, 1059, 973  $\text{cm}^{-1}$ ; HRMS (ESI, H)  $m/z$  calcd for:  $\text{C}_{15}\text{H}_{29}\text{N}_2\text{O}_5$  ( $\text{M}+\text{H}$ ) $^+$  317.2071, found ( $\text{M}+\text{H}$ ) $^+$  317.2074;  $[\alpha]_{\text{D}}^{24} -6.8$  (c 0.43,  $\text{CHCl}_3$ ).

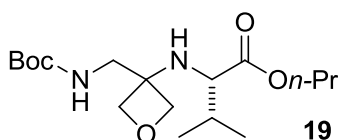

**Data for (S)-Propyl 2-((3-(((tert-butoxycarbonyl)amino)methyl)oxetan-3-yl)amino)-3-methyl butanoate (19):** (colorless oil, 5-18% MTBE/CH<sub>2</sub>Cl<sub>2</sub>, 85% yield); <sup>1</sup>H NMR (300 MHz, CDCl<sub>3</sub>) δ 4.95 (s (br), 1H), 4.43 (d, *J* = 6.4 Hz, 1H), 4.39-4.20 (m, 3H), 4.05 (t, *J* = 6.7 Hz, 2H), 3.58 (dd, *J* = 13.8, 6.0 Hz, 1H), 3.38 (dd, *J* = 13.8, 5.3 Hz, 1H), 3.11 (s (br), 1H), 1.99 (s (s (br), 1H), 1.97-1.84 (m, 1H), 1.72-1.58 (m, 2H), 1.43 (s, 9H), 1.02-0.82 (m, 9H); <sup>13</sup>C NMR (75 MHz, CDCl<sub>3</sub>) δ 176.0, 156.3, 79.7, 79.6, 66.9, 61.0, 59.7, 45.2, 32.2, 28.6, 22.1, 19.6, 18.2, 10.7; IR (thin film, NaCl) 2964, 2924, 2874, 1719, 1509, 1468, 1391, 1367, 1245, 1172, 981 cm<sup>-1</sup>; HRMS (ESI, H) *m/z* calcd for: C<sub>17</sub>H<sub>33</sub>N<sub>2</sub>O<sub>5</sub> (M+H)<sup>+</sup> 345.2384, found (M+H)<sup>+</sup> 345.2388; [α]<sub>D</sub><sup>26</sup> -0.1 (c 0.59, CHCl<sub>3</sub>).

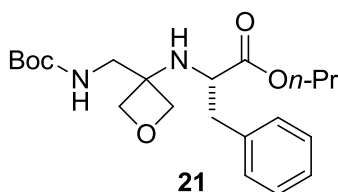

**Data for (S)-Propyl 2-((3-(((tert-butoxycarbonyl)amino)methyl)oxetan-3-yl)amino)-3-phenyl propanoate (21):** (colorless oil, 5-18% MTBE/CH<sub>2</sub>Cl<sub>2</sub>, 81% yield); <sup>1</sup>H NMR (300 MHz, CDCl<sub>3</sub>) δ 7.37-7.14 (m, 5H), 4.58 (s (br), 1H), 4.30-4.10 (m, 4H), 4.10-3.96 (m, 2H), 3.49 (dd, *J* = 8.7, 5.3 Hz, 1H), 3.41-3.35 (m, 2H), 2.98 (dd, *J* = 13.3, 5.3 Hz, 1H), 2.75 (dd, *J* = 13.4, 8.7 Hz, 1H), 2.06 (s (br), 1H), 1.67-1.53 (m, 2H), 1.42 (s, 9H), 0.89 (t, *J* = 7.4 Hz, 3H); <sup>13</sup>C NMR (75 MHz, CDCl<sub>3</sub>) δ 175.4, 156.1, 137.2, 129.3, 128.6, 127.0, 80.0, 79.5, 79.3, 67.1, 59.5, 57.5, 44.4, 40.9, 28.5, 22.0, 10.5; IR (thin film, NaCl) 3402, 3325, 2964, 2886, 1712, 1492, 1450, 1390, 1248, 1170, 977, 758, 697 cm<sup>-1</sup>; HRMS (ESI, H) *m/z* calcd for: C<sub>21</sub>H<sub>33</sub>N<sub>2</sub>O<sub>5</sub> (M+H)<sup>+</sup> 393.2384, found (M+H)<sup>+</sup> 393.2379; [α]<sub>D</sub><sup>27</sup> -6.9 (CHCl<sub>3</sub>, c 1.61).

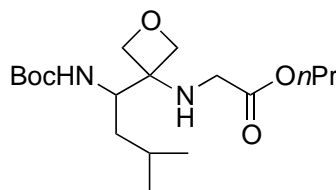

**Data for Propyl 2-((3-(1-((tert-butoxycarbonyl)amino)-3-methylbutyl)oxetan-3-yl)amino)acetate (52):** (pale yellow wax, 5-18% MTBE/CH<sub>2</sub>Cl<sub>2</sub>, 65% yield); <sup>1</sup>H NMR (300 MHz, CDCl<sub>3</sub>) δ 4.76 (d, *J* = 9.7 Hz, 1H), 4.62-4.26 (m, 4H), 4.15-4.07 (m, 3H), 3.85-3.43 (m, 2H), 1.90 (s (br), 1H), 1.76-1.60 (m, 3H), 1.42 (s, 9H), 1.34-1.04 (m, 2H), 1.04-0.85 (m, 9H); <sup>13</sup>C NMR (75

MHz, CDCl<sub>3</sub>) δ 172.8, 156.1, 79.4, 78.2, 77.5, 67.0, 63.4, 53.2, 45.0, 39.0, 28.6, 25.2, 24.0, 22.2, 21.9, 10.6; IR (thin film, NaCl) 3338, 2959, 2879, 1739, 1713, 1519, 1391, 1364, 1356, 1250, 1206, 1166, 981 cm<sup>-1</sup>; HRMS (ESI, H) *m/z* calcd for: C<sub>18</sub>H<sub>35</sub>N<sub>2</sub>O<sub>5</sub> (M+H)<sup>+</sup> 359.2540, found (M+H)<sup>+</sup> 359.2550.

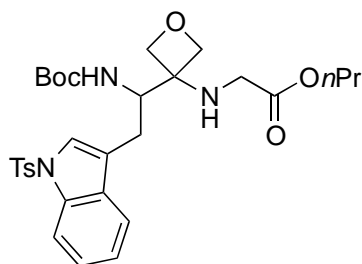

**Data for propyl 2-((3-(1-((tert-butoxycarbonyl)amino)-2-(1-tosyl-1H-indol-3-yl)ethyl)oxetan-3-yl)amino)acetate (56):** (pale yellow solid, 20-33% EtOAc/hexanes, 28% yield); <sup>1</sup>H NMR (300 MHz, C<sub>6</sub>D<sub>6</sub>) δ 8.26 (d, *J* = 8.3 Hz, 1H), 7.74 (d, *J* = 8.3 Hz, 2H), 7.67 (s, 1H), 7.52 (d, *J* = 7.6 Hz, 1H), 7.17-7.12 (m, 1H), 7.04 (t, *J* = 7.2 Hz, 1H), 6.56 (d, *J* = 7.8 Hz, 2H), 4.86 (d, *J* = 9.3 Hz, 1H), 4.55 (dd, *J* = 14.8, 7.0 Hz, 1H), 4.37 (d, *J* = 7.1 Hz, 1H), 4.15 (d, *J* = 7.3 Hz, 1H), 4.01-3.87 (m, 4H), 3.37 (q, *J* = 17.5 Hz, 2H), 2.61-2.58 (m, 2H), 1.67 (s, 4H), 1.45-1.34 (m, 11H), 0.72 (t, *J* = 7.4 Hz, 3H); <sup>13</sup>C NMR (75 MHz, C<sub>6</sub>D<sub>6</sub>) δ 172.6, 144.2, 136.0, 135.7, 135.3, 131.3, 129.6, 126.8, 124.9, 124.3, 123.4, 119.8, 119.4, 114.2, 79.3, 77.7, 77.2, 66.6, 63.0, 55.0, 44.8, 28.4, 25.4, 22.2, 21.0, 10.4; IR (thin film, NaCl) 2878, 1702, 1171 cm<sup>-1</sup>; HRMS (ESI, H) *m/z* calc'd for C<sub>30</sub>H<sub>40</sub>N<sub>3</sub>O<sub>7</sub>S (M + H)<sup>+</sup> 586.2581, found 586.2583.

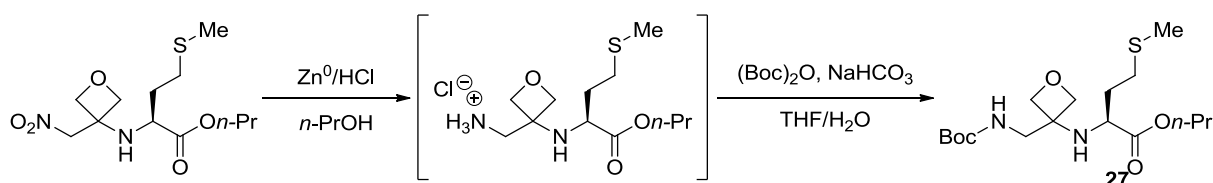

**The synthesis of (S)-propyl 2-((3-(((tert-butoxycarbonyl)amino)methyl)oxetan-3-yl)amino)-4-(methylthio) butanoate (27):** To a solution of (S)-propyl 4-(methylthio)-2-((3-(nitromethyl)oxetan-3-yl)amino)butanoate (0.049 g, 0.160 mmol) in *n*-PrOH (1.6 mL) was added Zn<sup>0</sup> (0.031 g, 0.480 mmol) (zinc powder used) and 1.0 M HCl<sub>(aq.)</sub> (0.8 mL, 0.800 mmol). The reaction was then stirred 1.5 hours at room temperature before being directly cannulated into a solution of (Boc)<sub>2</sub>O (0.048 mL, 0.208 mmol) in THF (1.0 mL) and 1.0 mL of saturated aqueous NaHCO<sub>3</sub> in a dropwise manner. The flask and cannula were washed with 1 mL THF. This milky white solution was stirred rapidly at room temperature for 1 hour. The reaction was then diluted with brine (60 mL) and extracted with EtOAc (3x 50 mL), dried over Na<sub>2</sub>SO<sub>4</sub> and concentrated *in vacuo*. The residue was purified by flash column chromatography (10-15% acetone/hexanes) to afford protected amine **29** as a colorless oil

(21 mg, 35%).

**Data for (S)-propyl 2-((3-(((tert-butoxycarbonyl)amino)methyl)oxetan-3-yl)amino)-4-(methylthio) butanoate (27):**  $^1\text{H}$  NMR (400 MHz,  $\text{CDCl}_3$ )  $\delta$  5.05 (s (br), 1H), 4.48 (d,  $J = 6.5$  Hz, 1H), 4.41-4.24 (m, 3H), 4.08 (t,  $J = 6.7$  Hz, 2H), 3.66-3.52 (m, 2H), 3.45 (dd,  $J = 13.9, 5.6$  Hz, 1H), 2.71-2.55 (m, 2H), 2.15-2.03 (m, 4H), 1.98-1.88 (m, 1H), 1.84-1.59 (m, 3H), 1.45 (s, 9H), 0.95 (t,  $J = 7.4$  Hz, 3H);  $^{13}\text{C}$  NMR (100 MHz,  $\text{CDCl}_3$ )  $\delta$  176.4, 156.6, 79.9, 79.8, 79.7, 67.3, 59.9, 54.2, 45.1, 33.5, 30.6, 28.6, 22.1, 15.4, 10.6; IR (thin film, NaCl) 3335, 2969, 2935, 2874, 1717, 1507, 1364, 1247, 1170, 974  $\text{cm}^{-1}$ ; HRMS (ESI, TOF-MS)  $m/z$  calcd for:  $\text{C}_{17}\text{H}_{33}\text{N}_2\text{O}_5\text{S}$  ( $\text{M}+\text{H}$ ) $^+$  377.2105; found ( $\text{M}+\text{H}$ ) $^+$  377.2109;  $[\alpha]_{\text{D}}^{20} -15.0$  (c 1.00,  $\text{CHCl}_3$ ).

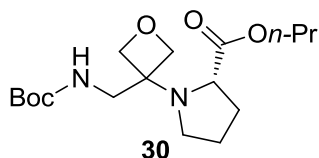

**The synthesis of (S)-propyl 1-(3-(((tert-butoxycarbonyl)amino)methyl)oxetan-3-yl)pyrrolidine-2-carboxylate (30):** To a solution of (S)-propyl pyrrolidine-2-carboxylate (0.148 g, 0.938 mmol) in DMSO (4 mL) was added 3-(nitromethylene)oxetane (0.090 g, 0.782 mmol). The reaction was then allowed to stir at room temperature for 4 hours. The solution was then diluted with EtOAc (100 mL) and washed with brine (2x, 50 mL), the organic layer was dried over  $\text{Na}_2\text{SO}_4$  and concentrated *in vacuo* to afford a residue. The residue was purified by flash column chromatography (20-30% EtOAc/hexanes) to afford a compound that had a  $^1\text{H}$  NMR consistent with the structure of the nitro alkane **15**, although contaminated with a minor inseparable impurity (ca. 0.184 g, ca. 86% yield). This material was carried on without any further purification.

To a solution of (S)-propyl 1-(3-(nitromethyl)oxetan-3-yl)pyrrolidine-2-carboxylate (0.184 g, 0.676 mmol), and  $(\text{Boc})_2\text{O}$  (0.204 mL, 0.878 mmol) in THF (6 mL) was added  $\text{NaHCO}_3$  (0.170 g, 2.027 mmol) and Raney Nickel (500 mg, 50% slurry in water, ca. 1 mL). The reaction was then stirred at room temperature for 3 hours under an atmosphere of  $\text{H}_2$ . After completion was confirmed by TLC, the catalyst was removed by filtration through celite and washing with EtOAc (100 mL). The filtrate was then diluted with water (75 mL) and extracted with EtOAc (3x 75 mL), the combined organics were then dried over  $\text{Na}_2\text{SO}_4$ , filtered and concentrated *in vacuo*. The residue was purified by silica gel chromatography (5-20% EtOAc/hexanes) to afford protected amine **30** as a colorless oil (176 mg, 65% over two steps).

**Data for (S)-propyl 1-(3-(((tert-butoxycarbonyl)amino)methyl)oxetan-3-yl)pyrrolidine-2-carboxylate (30):** (colorless oil, 4-8-10% acetone/hexanes, 76% yield)  $^1\text{H}$  NMR (400 MHz,  $\text{C}_6\text{D}_6$ )  $\delta$  5.62 (s, 1H), 4.46-4.37 (m, 2H), 4.23-4.15 (m, 2H), 3.81 (t,  $J = 6.7$  Hz, 2H), 3.64 (dd,  $J = 13.5,$

5.0 Hz, 1 H), 3.59-3.36 (m, 2H), 2.73-2.63 (m, 1H), 2.29-2.14 (m, 1H), 1.78-1.64 (m, 1H), 1.61-1.03 (m, 14H), 0.68 (t,  $J = 7.4$  Hz, 3H);  $^{13}\text{C}$  NMR (100 MHz,  $\text{C}_6\text{D}_6$ )  $\delta$  175.4, 156.7, 78.9, 77.2, 76.7, 66.6, 62.9, 60.2, 48.3, 47.0, 31.2, 28.7, 24.8, 22.4, 10.6; IR (thin film, NaCl) 3402, 2970, 2877, 1713, 1501, 1365, 1247, 1170  $\text{cm}^{-1}$ ; HRMS (ESI, TOF-MS)  $m/z$  calcd for:  $\text{C}_{17}\text{H}_{31}\text{N}_2\text{O}_5$  ( $\text{M}+\text{H}$ ) $^+$  343.2227; found ( $\text{M}+\text{H}$ ) $^+$  343.2222.

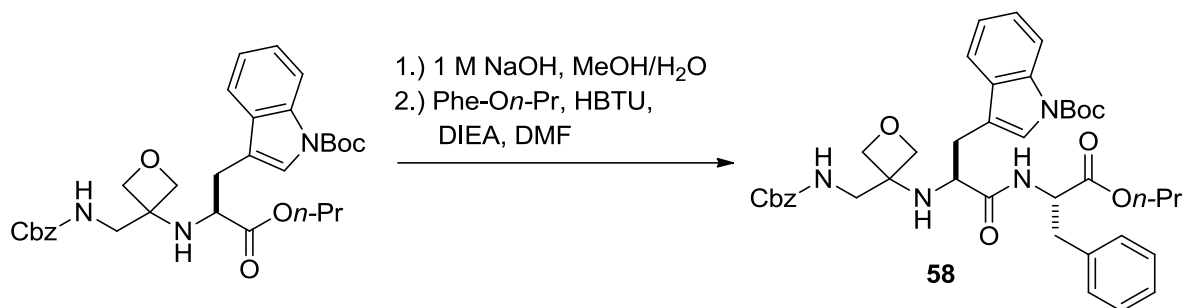

**The synthesis of Tripeptide 58 through *n*-propyl ester saponification:** To a solution of (S)-tert-butyl (2-((3-(((benzyloxy)carbonyl)amino)methyl)oxetan-3-yl)amino)-3-oxo-3-propoxypropyl)-1H indole-1-carboxylate (0.061 g, 0.107 mmol) in MeOH (2.7 mL) at room temperature was added 1M aqueous NaOH (0.75 mL, 0.752 mmol) and the resulting mixture was stirred for 2 hours. After 2 hours, the reaction mixture was diluted with EtOAc and 1M NaHSO<sub>4</sub> (50 mL) and extracted with EtOAc (3x 50 mL). The organic layers were collected, dried over Na<sub>2</sub>SO<sub>4</sub>, filtered, and concentrated *in vacuo* to afford a residue which was used without further purification. To the residue was sequentially added DMF (0.22 mL), (S)-propyl 2-amino-3-phenylpropanoate hydrochloride (0.031 g, 0.129 mmol), and DIEA (0.056 mL, 0.322 mmol). The mixture was then cooled to 0 °C and 2-(1H-benzo[d][1,2,3]triazol-1-yl)-1,1,3,3-tetramethylisouronium hexafluorophosphate(V) (HBTU) (0.049 g, 0.129 mmol) was added in one portion. After stirring 1 hour at 0 °C, the ice bath was removed and stirring was continued for 24 hours at room temperature. Then the reaction was concentrated *in vacuo* and the resulting residue was purified by silica gel chromatography (40-50% EtOAc/hexanes) to afford tripeptide **58** as a pale yellow solid (58 mg, 76% yield).

**Data for tert-butyl 3-((S)-2-((3-(((benzyloxy)carbonyl)amino)methyl)oxetan-3-yl)amino)-3-oxo-3-(((S)-1-oxo-3-phenyl-1-propoxypropan-2-yl)amino)propyl)-1H-indole-1-carboxylate (**58**):**  $^1\text{H}$  NMR (300 MHz,  $\text{C}_6\text{D}_6$ )  $\delta$  8.42 (s, 1H), 7.71 (d,  $J = 7.7$  Hz, 1H), 7.60 (s, 1H), 7.53 (d,  $J = 8.3$  Hz, 1H), 7.34-6.94 (m, 9H), 6.88 (d,  $J = 7.2$  Hz, 2H), 5.48 (t,  $J = 5.4$  Hz, 1H), 5.09 (m, 2H), 4.98 (dd,  $J = 14.2, 6.6$  Hz, 1H), 4.12 (d,  $J = 6.1$  Hz, 2H), 4.04 (t,  $J = 6.2$  Hz, 2H), 3.90-3.74 (m, 2H), 3.57-3.49 (m, 1H), 3.41 (dd,  $J = 14.3, 7.0$  Hz, 1H), 3.14-3.00 (m, 2H), 2.98-2.80 (m, 3H), 1.95 (s (br), 1H), 1.37 (s, 9H), 1.33-1.22 (m, 3H), 0.62 (d,  $J = 7.5$  Hz, 3H);  $^{13}\text{C}$  NMR (75 MHz,  $\text{C}_6\text{D}_6$ )  $\delta$  173.6, 172.0, 157.2, 149.5, 137.2, 136.3, 135.9, 130.6, 129.5, 129.3, 128.5, 128.4, 127.0, 126.6, 124.9, 124.6, 123.1, 119.5, 116.2, 115.7, 83.3, 78.5,

67.0, 66.8, 66.1, 60.6, 57.2, 53.1, 46.1, 38.2, 30.1, 27.9, 22.0, 10.3; IR (thin film, NaCl) 3320, 2964, 1723, 1513, 1452, 1155  $\text{cm}^{-1}$ ; HRMS (ESI, H)  $m/z$  calc'd for  $\text{C}_{40}\text{H}_{49}\text{N}_4\text{O}_8$  ( $M + \text{H}^+$ ) 713.3545, found 713.3550;  $[\alpha]_{\text{D}}^{26} -5.90$  (c 0.50,  $\text{CHCl}_3$ ).

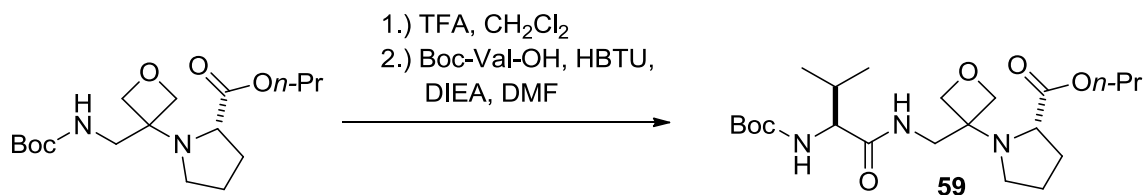

**Synthesis of tripeptide 59 through deprotection of N-Boc group:** A 0 °C solution of 20% TFA in  $\text{CH}_2\text{Cl}_2$  (1.7 mL) was added to (S)-propyl 1-(3-(((tert-butoxycarbonyl)amino)methyl)oxetan-3-yl)pyrrolidine-2-carboxylate (0.059 g, 0.172 mmol) at 0 °C, via cannula. After stirring for 30 minutes at 0 °C the ice bath was removed and the reaction was allowed to stir 1 hour at room temperature. Then toluene (ca. 1 mL) was added and the solution was evaporated *in vacuo*. The addition of 1 mL of toluene and evaporation was repeated two more times to afford a crude TFA salt which was used without further purification. To the crude TFA salt was sequentially added DMF (0.35 mL), (S)-2-(((tert-butoxycarbonyl)amino)-3-methylbutanoic acid (0.045 g, 0.207 mmol), DIEA (0.090 mL, 0.517 mmol), the reaction was then cooled to 0 °C and 2-(1H-benzo[d][1,2,3]triazol-1-yl)-1,1,3,3-tetramethylisouronium hexafluorophosphate(V) (0.078 g, 0.207 mmol) in one portion. After stirring for 1 hour stirring at 0 °C, the ice bath was removed and the reaction stirred for 24 hours at room temperature. The reaction was then concentrated *in vacuo*. The resulting crude residue was purified by silica gel chromatography (33-66% EtOAc/hexanes) to afford tripeptide **59** as a pale yellow oil (51 mg, 67% yield).

**Data for (S)-propyl 1-(3-(((S)-2-(((tert-butoxycarbonyl)amino)-3-methylbutanamido)methyl)oxetan-3-yl)pyrrolidine-2-carboxylate (59):**  $^1\text{H}$  NMR (300 MHz,  $\text{C}_6\text{D}_6$ )  $\delta$  7.10 (t,  $J = 4.5$  Hz, 1H), 5.61 (d,  $J = 8.8$  Hz, 1H), 4.43 (t,  $J = 7.0$  Hz, 2H), 4.34-4.29 (m, 1H), 4.26 (d,  $J = 6.8$  Hz, 1H), 4.18 (d,  $J = 6.6$  Hz, 1H), 3.82 (t,  $J = 6.6$  Hz, 2H), 3.76-3.62 (m, 2H), 3.62-3.53 (m, 1H), 2.74-2.69 (m, 1H), 2.25-2.17 (m, 2H), 1.74-1.49 (m, 3H), 1.42 (s, 9H), 1.38-1.26 (m, 3H), 1.02 (d,  $J = 6.7$  Hz, 3H), 0.90 (d,  $J = 6.8$  Hz, 3H), 0.69 (d,  $J = 7.4$  Hz, 3H);  $^{13}\text{C}$  NMR (75 MHz,  $\text{C}_6\text{D}_6$ )  $\delta$  175.5, 171.9, 155.9, 78.8, 77.2, 76.4, 66.4, 62.2, 60.4, 59.8, 47.7, 45.2, 31.7, 31.0, 28.4, 24.6, 22.2, 19.6, 18.0, 10.4; IR (thin film, NaCl) 3313, 2964, 2877, 1660, 1515, 1163  $\text{cm}^{-1}$ ; HRMS (ESI, H)  $m/z$  calc'd for  $\text{C}_{22}\text{H}_{40}\text{N}_3\text{O}_6$  ( $M + \text{H}^+$ ) 442.2912, found 442.2904;  $[\alpha]_{\text{D}}^{28} +11.6$  (c 0.44,  $\text{CHCl}_3$ ).

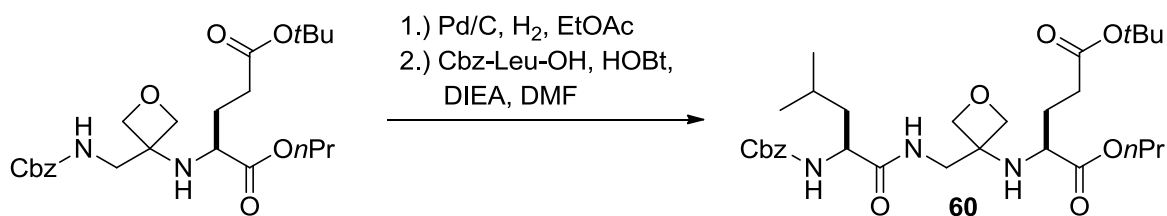

**Synthesis of tripeptide 60 through deprotection of *N*-Cbz group:** To a solution of (*S*)-5-tert-butyl 1-propyl 2-((3-(((benzyloxy)carbonyl)amino)methyl)oxetan-3-yl)amino)pentanedioate (0.120 g, 0.257 mmol) in EtOAc (5.1 mL) was added 10% Pd/C (0.014 g, 0.013 mmol) and the reaction mixture was stirred under an H<sub>2</sub> for one hour. Then the reaction was then filtered through celite and the filtrate was concentrated to afford a residue which was used without further purification. To the residue was sequentially added DMF (0.26 mL), (*S*)-2-(((benzyloxy)carbonyl)amino)-4-methylpentanoic acid (0.082 g, 0.309 mmol), and DIEA (0.090 mL, 0.515 mmol), the solution was then cooled to 0 °C and 2-(1H-benzo[d][1,2,3]triazol-1-yl)-1,1,3,3-tetramethylisouronium hexafluorophosphate(V) (HBTU) (0.117 g, 0.309 mmol) was added in one portion. After stirring for 1 hour at 0 °C, the ice bath was removed, and the reaction was further stirred for 24 hours at room temperature. The reaction was then concentrated *in vacuo* and the resulting crude residue was purified by silica gel chromatography (33-50% EtOAc/hexanes) to afford tripeptide **60** as a colorless oil (92 mg, 62% yield).

**Data for (*S*)-5-tert-butyl 1-propyl 2-((3-(((*S*)-2-(((benzyloxy)carbonyl)amino)-4-methylpentanamido)methyl)oxetan-3-yl)amino)pentanedioate (**60**):** <sup>1</sup>H NMR (300 MHz, C<sub>6</sub>D<sub>6</sub>) δ 7.25 (d, *J* = 7.0 Hz, 3H), 7.18-7.01 (m, 2H), 6.17 (d, *J* = 8.3 Hz, 1H), 5.10 (s, 2H), 4.59 (dd, *J* = 13.5, 8.6 Hz, 1H), 4.46 (d, *J* = 6.3 Hz, 1H), 4.35 (d, *J* = 6.4 Hz, 1H), 4.30 (d, *J* = 5.2 Hz, 2H), 3.84-3.61 (m, 4H), 3.39 (dd, *J* = 8.7, 4.4 Hz, 1H), 2.37-2.19 (m, 3H), 2.04-1.59 (m, 5H), 1.44-1.26 (m, 12H), 0.96 (d, *J* = 5.9 Hz, 3H), 0.92 (d, *J* = 6.2 Hz, 3H), 0.67 (d, *J* = 7.4 Hz, 3H); <sup>13</sup>C NMR (75 MHz, C<sub>6</sub>D<sub>6</sub>) δ 175.8, 173.4, 172.5, 156.5, 137.1, 128.4, 127.9, 80.2, 79.6, 79.3, 66.8, 66.7, 60.1, 54.9, 54.2, 43.8, 41.9, 32.2, 29.9, 28.0, 25.1, 23.2, 22.1, 22.0, 10.4; IR (thin film, NaCl) 3316, 2959, 2874, 1723, 1550, 1150 cm<sup>-1</sup>; HRMS (ESI, H) *m/z* calc'd for C<sub>30</sub>H<sub>48</sub>N<sub>3</sub>O<sub>8</sub> (M + H)<sup>+</sup> 578.3436, found 578.3427; [α]<sub>D</sub><sup>26</sup> -11.3 (c 0.50, CHCl<sub>3</sub>).

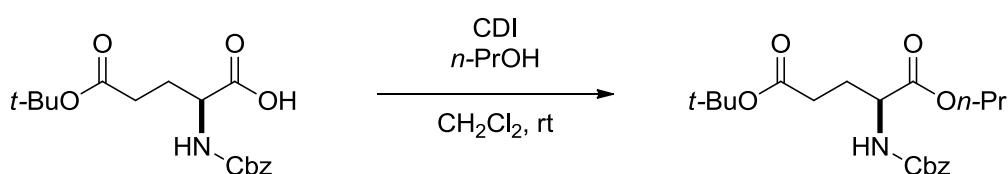

**General Procedure (F): Conjugate addition of free-based amino acids to 3-(nitromethylene)oxetane.**

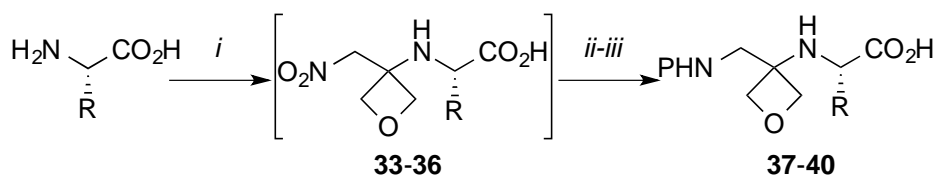

A solution of 3-(nitromethylene)oxetane (1 mmol) in THF was added to a solution of the desired amino acid (1 mmol) and  $\text{NaHCO}_3$  (3 mmol) in a mixture of water and THF. The reaction mixture was stirred at room temperature until disappearance of the nitro-olefin. To the reaction mixture was then added Ra-Ni (commercial suspension in water, 1 mL) and the reaction mixture was stirred at room temperature under  $\text{H}_2$  (1 atm) until disappearance of the intermediate nitro-acid. The reaction mixture was filtered through Celite<sup>®</sup> and washed with THF. The filtrate was evaporated to a minimal amount of solvent and treated with either CbzCl or FmocOSu (1.1 eq) and reacted until disappearance of the aminoacid dimer. The crude mixtures were acidified to pH 2 and extracted with ethyl acetate. The combined organic extracts were concentrated and the residues purified by chromatography ( $\text{SiO}_2$ ,  $\text{CH}_2\text{Cl}_2$ , MeOH) to afford the desired products.

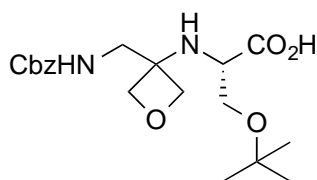

**Data for (S)-2-((3-(((benzyloxy)carbonyl)amino)methyl)oxetan-3-yl)amino)-3-(tert-butoxy)propanoic acid (37):**  $^1\text{H}$  NMR (400 MHz,  $\text{CD}_3\text{OD}$ )  $\delta$  7.43-7.26 (m, 5H), 5.10 (s, 2H), 4.61 (dd,  $J = 6.4, 6.4$  Hz, 2H), 4.45 (dd,  $J = 6.4, 6.4$  Hz, 2H), 3.77-3.50 (m, 5H), 1.20 (s, 9H);  $^{13}\text{C}$ -NMR (100 MHz,  $\text{CD}_3\text{OD}$ )  $\delta$  176.8, 159.4, 138.1, 129.5, 129.1, 128.9, 79.7, 79.3, 74.9, 67.9, 64.1, 62.0, 59.9, 45.3, 27.7; IR (thin film, NaCl) 3317, 2972, 1713, 1635, 1455 1410, 1391, 1364, 1236, 1190, 1080, 1023, 979, 863, 775, 738, 697, 665, 555, 459  $\text{cm}^{-1}$ ; HRMS (Dual (MALDI/ESI))  $m/z$  calcd for  $\text{C}_{19}\text{H}_{29}\text{N}_2\text{O}_6$  ( $\text{M} + \text{H}$ )<sup>+</sup> 381.2020, found 381.2019;  $[\alpha]_{\text{D}}^{23} - 1.084$  (c 0.50, MeOH).

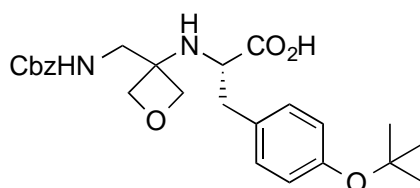

**Data for (S)-2-((3-(((benzyloxy)carbonyl)amino)methyl)oxetan-3-yl)amino)-3-(4-(tert-butoxy)phenyl)propanoic acid (38):**  $^1\text{H}$  NMR (400 MHz,  $\text{CD}_3\text{OD}$ )  $\delta$  7.40-7.23 (m, 6H), 7.19 (d,  $J = 8.2$  Hz, 2H), 6.89 (d,  $J = 8.3$  Hz, 2H), 5.07 (s, 2H), 4.31-4.14 (m, 4H), 3.45-3.33 (m, 3H), 3.06 (dd,  $J = 13.4, 4.5$  Hz, 1H), 2.64 (dd,  $J = 13.0, 9.0$  Hz, 1H), 1.28 (s, 9H);  $^{13}\text{C}$ -NMR



(100 MHz, CD<sub>3</sub>OD)  $\delta$  183.1, 159.3, 155.2, 139.2, 135.4, 131.1, 131.0, 129.5, 129.0, 128.9, 125.2, 80.5, 80.1, 79.4, 67.7, 61.4, 61.1, 46.2, 41.2, 29.2; IR (thin film, NaCl) 3319, 2928, 1694, 1569, 1506, 1411, 1365, 1236, 1160, 1017, 974, 924, 896, 847, 774, 736, 697, 544, 474 cm<sup>-1</sup>; HRMS (Dual (MALDI/ESI))  $m/z$  calcd for C<sub>25</sub>H<sub>33</sub>N<sub>2</sub>O<sub>6</sub> (M + H)<sup>+</sup> 457.2333, found 457.2331;  $[\alpha]_D^{23}$  -33.74 (c 0.45, MeOH).

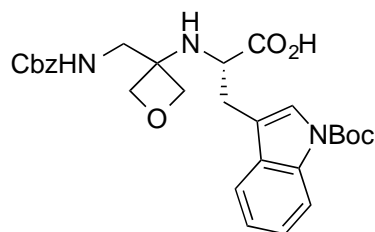

**Data for (S)-2-((3-(((benzyloxy)carbonyl)amino)methyl)oxetan-3-yl)amino)-3-(1-(tert-butoxycarbonyl)-1H-indol-3-yl)propanoic acid (39):**  $^1\text{H}$  NMR (400 MHz,  $d^6$ -DMSO)  $\delta$  8.00 (d,  $J = 7.4$  Hz, 1H), 7.66 (d,  $J = 7.4$  Hz, 1H), 7.50 (s, 1H), 7.40-7.14 (m, 7H), 5.00 (d,  $J = 12.6$  Hz, 1H), 4.98 (d,  $J = 12.6$  Hz, 1H), 4.19 (d,  $J = 5.2$  Hz, 1H), 4.17 (s, 2H), 4.10 (d,  $J = 6.0$  Hz, 1H), 3.54-3.26 (m, 3H), 3.22 (dd,  $J = 13.9, 5.5$  Hz, 1H), 3.03 (d (br),  $J = 11.3$  Hz, 1H), 2.72 (dd,  $J = 14.1, 7.8$  Hz, 1H), 1.60 (s, 9H);  $^{13}\text{C}$ -NMR (100 MHz,  $d^6$ -DMSO)  $\delta$  178.7, 157.1, 149.6, 137.6, 135.0, 131.2, 128.8, 128.2, 128.1, 124.5, 124.0, 122.7, 120.1, 115.0, 83.8, 78.7, 65.8, 60.2, 57.8, 45.6, 30.8, 28.2; IR (thin film, NaCl) 3406, 2936, 2244, 1727, 1574, 1452, 1367, 1309, 1255, 1227, 1155, 1085, 1018, 976, 855, 836, 766, 745, 697, 651, 573, 473, 423  $\text{cm}^{-1}$ ; HRMS (Dual (MALDI/ESI))  $m/z$  calcd for  $\text{C}_{28}\text{H}_{34}\text{N}_3\text{O}_7$  ( $\text{M} + \text{H}$ ) $^+$  524.2391, found 524.2391.

**Data for (3-(((9H-fluoren-9-yl)methoxy)carbonyl)amino)methyl)oxetan-3-yl)-L-valine (40):**

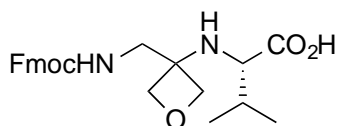

$^1\text{H}$ -NMR (400 MHz, Methanol- $d_4$ )  $\delta$  7.79 (d,  $J = 7.5$  Hz, 2H), 7.65 (d,  $J = 7.1$  Hz, 2H), 7.38 (t,  $J = 7.5$  Hz, 2H), 7.30 (t,  $J = 7.4$  Hz, 2H), 4.59 (d,  $J = 6.8$  Hz, 1H), 4.52 (d,  $J = 7.0$  Hz, 1H), 4.47-4.32 (m, 4H), 4.21 (t,  $J = 6.9$  Hz, 1H), 3.62 (d,  $J = 14.3$  Hz, 1H), 3.51 (d,  $J = 14.4$  Hz, 1H), 3.32 (m, 1H), 2.02 (ddd,  $J = 13.1, 9.1, 5.5$  Hz, 1H), 0.99 (d,  $J = 10.0$ , 3H), 0.98 (d,  $J = 10.0$  Hz, 3H).  $^{13}\text{C}$ -NMR (100 MHz,  $\text{CD}_3\text{OD}$ )  $\delta$  178.7, 159.5, 145.3, 145.3, 142.6, 128.8, 128.1, 126.2, 126.2, 120.9, 79.5, 79.4, 68.0, 63.3, 62.0, 49.6, 49.5, 49.4, 49.3, 49.2, 49.1, 49.0, 48.8, 48.6, 48.5, 48.4, 46.2, 32.7, 19.5, 18.6. IR (thin film, NaCl) 2962, 1697, 1623, 1536, 1449, 1389, 1248, 1149, 982, 908, 758, 730, 647, 621, 560, 542, 425  $\text{cm}^{-1}$ ; HRMS (Dual (MALDI/ESI))  $m/z$  calcd for  $\text{C}_{24}\text{H}_{29}\text{N}_2\text{O}_5$  ( $\text{M} + \text{H}$ ) $^+$  425.2071, found 425.2070;  $[\alpha]_D^{23}$  4.314 (c 0.60,  $\text{CHCl}_3$ ).

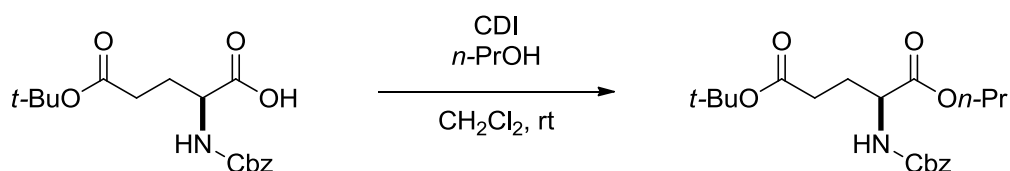

**General Procedure G: Synthesis of *n*-propyl ester amino acids through CDI mediated coupling with *n*-PrOH.** The synthesis of **(S)-5-tert-butyl 1-propyl 2-(((benzyloxy)carbonyl)amino)pentanedioate (S-9)**: To a solution of (S)-3-(4-(tert-butoxy)phenyl)-2-((tert-butoxycarbonyl)amino)propanoic acid (0.500 g, 1.482 mmol) in CH<sub>2</sub>Cl<sub>2</sub> (3 ml) at room temperature was added CDI (0.240 g, 1.482 mmol) in a portion wise manner (evolution of CO<sub>2(g)</sub>). The reaction mixture was stirred for 1 hour at room temperature, then *n*-propanol (0.55 mL, 7.41 mmol) was added and stirring was continued overnight at the same temperature. The reaction was then quenched with 1M aqueous citric acid, extracted with CH<sub>2</sub>Cl<sub>2</sub>, dried over Na<sub>2</sub>SO<sub>4</sub>, filtered and concentrated *in vacuo*. The resulting residue was purified by silica gel chromatography (50% EtOAc/hexane) to afford ester **S-9** as colorless oil (564 mg, 98% yield).

**Data for (S)-5-tert-butyl 1-propyl 2-(((benzyloxy)carbonyl)amino)pentanedioate (S-9):** <sup>1</sup>H NMR (300 MHz, CDCl<sub>3</sub>) δ 7.33-7.23 (m, 5H), 5.54 (d, *J* = 8.2 Hz, 1H), 5.07 (s, 2H), 4.36 (td, *J* = 8.3, 5.0 Hz, 1H), 4.06 (t, *J* = 6.7 Hz, 2H), 2.42-2.20 (m, 2H), 2.16-2.20 (m, 1H), 1.98-1.85 (m, 1H), 1.62 (dt, *J* = 13.9, 7.0 Hz, 2H), 1.41 (s, 9H), 0.91 (t, *J* = 7.4 Hz, 3H); <sup>13</sup>C NMR (75 MHz, CDCl<sub>3</sub>) δ 171.7, 171.6, 155.6, 136.0, 128.2, 127.9, 127.8, 80.6, 67.1, 66.9, 53.6, 31.6, 28.2, 27.8, 22.1, 10.5; IR (thin film, NaCl) 3353, 2972, 1723, 1520, 1148, 1055, 736, 697 cm<sup>-1</sup>; HRMS (ESI, H) *m/z* calc'd for C<sub>20</sub>H<sub>30</sub>NO<sub>6</sub> (M + H)<sup>+</sup> 380.2068, found 380.2072; [α]<sub>D</sub><sup>25</sup> +4.82 (c 0.50, CHCl<sub>3</sub>).

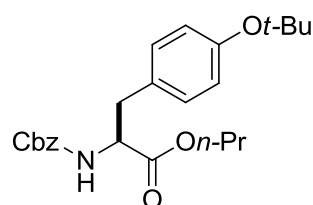

**Data for (S)-propyl 2-(((benzyloxy)carbonyl)amino)-3-(4-(tert-butoxy)phenyl)propanoate (S-7):** (colorless oil, 50% EtOAc/hexanes, 98% yield); <sup>1</sup>H NMR (300 MHz, CDCl<sub>3</sub>) δ 7.34-7.27 (m, 5H), 7.00 (d, *J* = 8.4 Hz, 2H), 6.88 (d, *J* = 8.5 Hz, 2H), 5.40 (d, *J* = 8.2 Hz, 1H), 5.08 (s, 2H), 4.62 (dd, *J* = 14.2, 6.1 Hz, 1H), 4.06-4.00 (m, 2H), 3.05 (dd, *J* = 5.9, 2.9 Hz, 2H), 1.65-1.53 (m, 2H), 1.32 (s, 9H), 0.88 (t, *J* = 7.4 Hz, 3H); <sup>13</sup>C NMR (75 MHz, CDCl<sub>3</sub>) δ 171.3, 155.3, 154.1, 136.1, 130.4, 129.5, 128.3, 127.91, 127.85, 124.0, 78.3, 67.0, 66.9, 55.1, 37.8, 29.0, 22.0, 10.6; IR (thin film, NaCl) 3331, 2974, 2361, 1715, 1505, 1160, 1057, 896, 746, 697 cm<sup>-1</sup>; HRMS (ESI, H) *m/z* calc'd for C<sub>24</sub>H<sub>32</sub>NO<sub>5</sub> (M + H)<sup>+</sup> 414.2275, found 414.2272; [α]<sub>D</sub><sup>25</sup>

+36.8 (c 0.50, CHCl<sub>3</sub>).

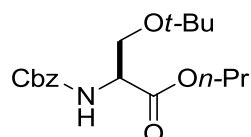

**Data for (S)-propyl 2-(((benzyloxy)carbonyl)amino)-3-(tert-butoxy)propanoate (S-8):** (colorless oil, 50% EtOAc/hexanes, 94% yield); <sup>1</sup>H NMR (300 MHz, CDCl<sub>3</sub>) δ 7.37-7.21 (m, 5H), 5.68 (d, *J* = 8.9 Hz, 1H), 5.09 (s, 2H), 4.43 (dt, *J* = 8.8, 2.9 Hz, 1H), 4.09-4.02 (m, 2H), 3.78 (dd, *J* = 8.9, 2.8 Hz, 1H), 3.54 (dd, *J* = 8.9, 3.2 Hz, 1H), 1.70-1.52 (m, 2H), 1.09 (s, 9H), 0.90 (t, *J* = 7.4 Hz, 3H); <sup>13</sup>C NMR (75 MHz, CDCl<sub>3</sub>) δ 170.5, 156.0, 136.3, 128.3, 127.9, 73.1, 66.7, 61.9, 54.6, 27.1, 21.8, 10.2; IR (thin film, NaCl) 3446, 3343, 2971, 1724, 1503, 1194, 1062, 737, 697 cm<sup>-1</sup>; HRMS (ESI, H) *m/z* calc'd for C<sub>18</sub>H<sub>28</sub>NO<sub>5</sub> (M + H)<sup>+</sup> 338.1962, found 338.1962; [α]<sub>D</sub><sup>25</sup> +6.85 (c 0.50, CHCl<sub>3</sub>).

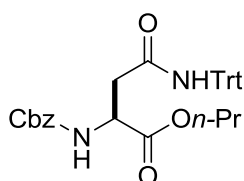

**Data for (S)-propyl 2-(((benzyloxy)carbonyl)amino)-4-oxo-4-(tritylamino)butanoate (S-10):** (white solid, 33-50%, EtOAc/hexanes, 83%); <sup>1</sup>H NMR (300 MHz, CDCl<sub>3</sub>) δ 7.33-7.14 (m, 20H), 6.72 (s, 1H), 6.06 (d, *J* = 8.1 Hz, 1H), 5.10 (s, 2H), 4.54 (dt, *J* = 8.5, 4.2 Hz, 1H), 4.03 (t, *J* = 6.7 Hz, 2H), 3.06 (dd, *J* = 15.6, 4.2 Hz, 1H), 2.81 (dd, *J* = 15.7, 3.8 Hz, 1H), 1.84-1.46 (m, 2H), 0.87 (t, *J* = 7.4 Hz, 3H); <sup>13</sup>C NMR (75 MHz, CDCl<sub>3</sub>) δ 170.8, 169.0, 156.1, 144.1, 136.2, 128.5, 128.4, 127.9, 127.7, 127.0, 70.9, 67.3, 66.8, 51.1, 38.6, 21.9, 10.4; IR (thin film, NaCl) 3302, 1967, 1702, 1651, 1523, 1255, 1056, 698 cm<sup>-1</sup>; HRMS (ESI, H) *m/z* calc'd for C<sub>34</sub>H<sub>35</sub>N<sub>2</sub>O<sub>5</sub> (M + H)<sup>+</sup> 551.2540, found 551.2543; [α]<sub>D</sub><sup>24</sup> +4.41 (c 0.50, CHCl<sub>3</sub>).

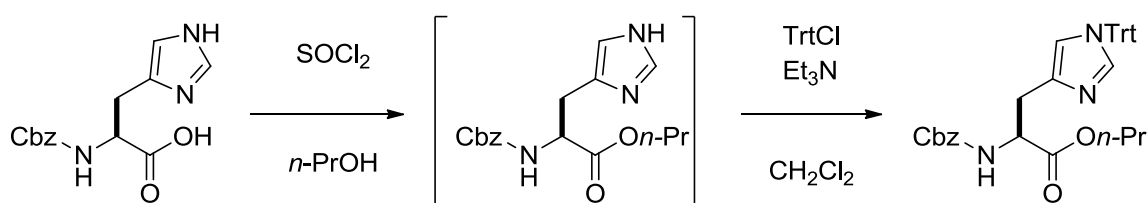

**Synthesis of (S)-propyl 2-(((benzyloxy)carbonyl)amino)-3-(1-trityl-1H-imidazol-4-yl)propanoate (S-11):** To *n*-PrOH (4.1 mL) at 0 °C was added SOCl<sub>2</sub> (0.298 mL, 4.08 mmol) followed by (S)-2-(((benzyloxy)carbonyl)amino)-3-(1H-imidazol-4-yl)propanoic acid (0.590 g, 2.039 mmol). The reaction mixture was stirred for 30 minutes at the same temperature and then the ice bath was removed. The resultant mixture was then stirred for 3 days at room

temperature. The reaction mixture was then concentrated *in vacuo* to afford a blue oil, which was then then diluted with CH<sub>2</sub>Cl<sub>2</sub> (200 mL) and washed with saturated aqueous NaHCO<sub>3</sub>, and brine (100 mL each), dried over Na<sub>2</sub>SO<sub>4</sub>, filtered and concentrated *in vacuo*. The resulting crude residue was carried on without further purification.

The residue was dissolved in CH<sub>2</sub>Cl<sub>2</sub> (10.2 mL) and treated with Et<sub>3</sub>N (0.341 mL, 2.448 mmol), and (chloromethanetriyl)tribenzene (0.682 g, 2.448 mmol). After stirring for 6 hours at room temperature, the reaction mixture was diluted with EtOAc (150 mL) and washed with water, and brine (75 mL each); dried over Na<sub>2</sub>SO<sub>4</sub>, filtered and concentrated *in vacuo*. The residue was purified by silica gel chromatography (20-33% EtOAc/hexane) to afford protected amino acid **S-11** as a white solid (1.05 g, 90% yield over two steps).

**Data for (S)-propyl 2-(((benzyloxy)carbonyl)amino)-3-(1-trityl-1H-imidazol-4-yl)propanoate (S-11):** <sup>1</sup>H NMR (300 MHz, CDCl<sub>3</sub>) δ 7.48-7.23 (m, 15H), 7.16-7.01 (m, 6H), 6.53 (s, 1H), 6.45 (d, *J* = 8.4 Hz, 1H), 5.10 (s, 2H), 4.77-4.39 (m, 1H), 3.97 (dd, *J* = 11.2, 6.2 Hz, 2H), 3.05 (t, *J* = 4.6 Hz, 2H), 1.54 (dd, *J* = 14.1, 7.0 Hz, 2H), 0.84 (t, *J* = 7.3 Hz, 3H); <sup>13</sup>C NMR (75 MHz, CDCl<sub>3</sub>) δ 171.4, 156.0, 142.1, 138.7, 136.4, 136.2, 129.6, 128.3, 127.9, 127.8, 119.4, 75.2, 66.71, 66.66, 54.2, 30.2, 22.0, 10.5; IR (thin film, NaCl) 3330, 2966, 2359, 1721, 1494, 1185, 1057, 749, 700 cm<sup>-1</sup>; HRMS (ESI, H) *m/z* calc'd for C<sub>36</sub>H<sub>36</sub>N<sub>3</sub>O<sub>4</sub> (M + H)<sup>+</sup> 574.2700, found 574.2689; [α]<sub>D</sub><sup>26</sup> +10.8 (*c* 0.50, CHCl<sub>3</sub>).

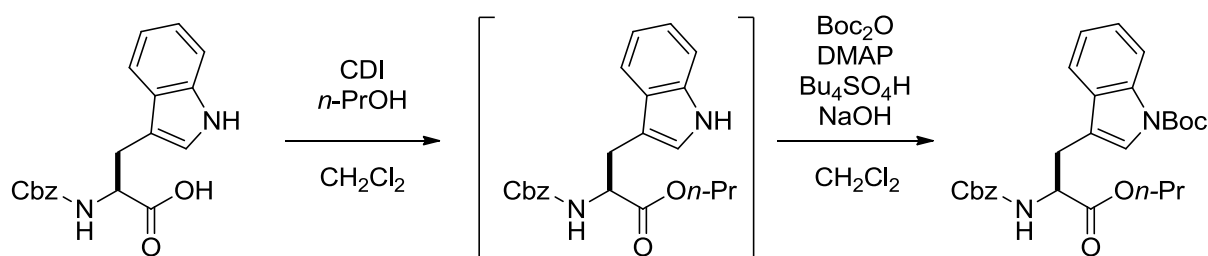

**Synthesis of (S)-tert-butyl 3-(2-(((benzyloxy)carbonyl)amino)-3-oxo-3-propoxypropyl)-1H-indole-1-carboxylate (S-12):** To a solution of (S)-2-(((benzyloxy)carbonyl)amino)-3-(1H-indol-3-yl)propanoic acid (1.7 g, 5.02 mmol) in CH<sub>2</sub>Cl<sub>2</sub> (10 mL) at room temperature was added CDI (0.896 g, 5.53 mmol) in a portion wise manner. The reaction mixture was stirred for 1 hour at room temperature, and then propan-1-ol (1.90 mL, 25.1 mmol) was added. After stirring overnight at room temperature, reaction was quenched with 1M aqueous citric acid, extracted with CH<sub>2</sub>Cl<sub>2</sub> (3x 150 mL) then dried over Na<sub>2</sub>SO<sub>4</sub>, filtered and concentrated *in vacuo*. The resulting residue was purified by silica gel chromatography (20% EtOAc/hexanes) to afford a compound with which exhibited a <sup>1</sup>H NMR spectrum which was consistent with the propyl ester, although contaminated with some minor impurities (ca. 1.4

g). This mixture was carried on without further purification.

To a solution of the propyl ester in dry  $\text{CH}_2\text{Cl}_2$  (35.9 mL) were sequentially added tetrabutylammonium hydrogen sulfate (0.122 g, 0.359 mmol) and freshly powdered NaOH (0.718 g, 17.95 mmol). The resulting solution was stirred for 15 min, and a solution of  $(\text{Boc})_2\text{O}$  (2.50 mL, 10.77 mmol) in  $\text{CH}_2\text{Cl}_2$  (10 mL) was added in drop wise manner over 5 minutes. The resulting white suspension was vigorously stirred for 1.5 hours at room temperature. Water (150 mL) was then added to the reaction, layers separated, and the aqueous layer was extracted with  $\text{CH}_2\text{Cl}_2$  (4x, 150 mL), the combined organics were then dried over  $\text{Na}_2\text{SO}_4$ , filtered and concentrated *in vacuo*. The resulting residue was purified by silica gel chromatography (10% EtOAc/hexane) to afford protected amino acid **S-12** as a colorless oil (948 mg, 39% yield in two steps).

**Data for (S)-tert-butyl 3-(2-(((benzyloxy)carbonyl)amino)-3-oxo-3-propoxypropyl)-1H-indole-1-carboxylate (S-12):**  $^1\text{H}$  NMR (300 MHz,  $\text{CDCl}_3$ )  $\delta$  8.14 (d,  $J$  = 7.9 Hz, 1H), 7.72-7.05 (m, 9H), 5.51 (d,  $J$  = 8.0 Hz, 1H), 5.24-4.96 (m, 2H), 4.75 (dd,  $J$  = 13.5, 5.7 Hz, 1H), 4.05 (td,  $J$  = 6.5, 2.3 Hz, 2H), 3.26 (t,  $J$  = 5.0 Hz, 2H), 1.67 (s, 9H), 1.65-1.37 (m, 2H), 0.87 (d,  $J$  = 7.4 Hz, 3H);  $^{13}\text{C}$  NMR (75 MHz,  $\text{CDCl}_3$ )  $\delta$  171.3, 155.4, 149.2, 136.0, 135.1, 130.3, 128.3, 128.0, 127.9, 124.4, 123.9, 122.4, 118.7, 115.1, 114.8, 83.6, 67.2, 67.0, 54.3, 28.4, 28.1, 22.0, 10.5; IR (thin film, NaCl) 3351, 2973, 1725, 1153, 747  $\text{cm}^{-1}$ ; HRMS (ESI, H)  $m/z$  calc'd for  $\text{C}_{27}\text{H}_{33}\text{N}_2\text{O}_6$  ( $\text{M} + \text{H}$ ) $^+$  481.2333, found 481.2327;  $[\alpha]_{\text{D}}^{25}$  +23.8 ( $c$  0.50,  $\text{CHCl}_3$ ).

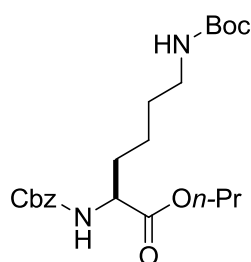

**Data for (S)-propyl 2-(((benzyloxy)carbonyl)amino)-6-((tert-butoxycarbonyl)amino)hexanoate (S-13):** (colorless oil, 33-50%, EtOAc/hexanes, 83% yield);  $^1\text{H}$  NMR (400 MHz,  $\text{CDCl}_3$ )  $\delta$  7.39-7.27 (m, 5H), 5.45-5.31 (m, 1H), 5.09 (s, 2H), 4.65-4.48 (m, 1H), 4.40-4.28 (m, 1H), 4.16-3.99 (m, 2H), 3.14-2.97 (m, 2H), 1.90-1.78 (m, 1H), 1.74-1.57 (m, 3H), 1.52-1.25 (m, 12H), 0.93 (t,  $J$  = 7.4 Hz, 3H);  $^{13}\text{C}$  NMR (75 MHz,  $\text{CDCl}_3$ )  $\delta$  172.7, 156.2, 136.5, 128.7, 128.4, 128.3, 79.3, 67.2, 67.1, 54.0, 40.2, 32.5, 29.8, 28.6, 22.5, 22.1, 10.5; IR (thin film, NaCl) 3349, 2966, 2931, 1712, 1524, 1249, 1169, 1055, 739  $\text{cm}^{-1}$ ; HRMS (ESI, H)  $m/z$  calc'd for  $\text{C}_{22}\text{H}_{34}\text{N}_2\text{Na}$  ( $\text{M} + \text{Na}$ ) $^+$  445.2309, found 445.2313;  $[\alpha]_{\text{D}}^{29}$  +3.02 ( $c$  2.00,  $\text{CHCl}_3$ ).

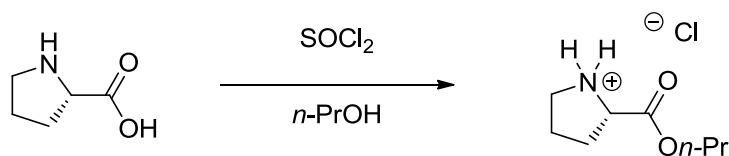

**General Procedure G: the synthesis of propyl esters through Fisher esterification. The synthesis of (S)-propyl pyrrolidine-2-carboxylate hydrochloric acid salt (S-15):** To *n*-PrOH (50 mL) at 0 °C was added SOCl<sub>2</sub> (9.51 mL, 130 mmol) in a dropwise manner via addition funnel over 20 minutes. Upon completion of addition (S)-proline (5.00 g, 43.4 mmol) was added in one portion and the reaction was allowed to warm to room temperature and stir overnight. The reaction was then concentrated *in vacuo*, ether (150 mL) was then added to the residue, and the mixture stirred rapidly for 30 minutes. The ether was then decanted, and the residue dried on the high vacuum to afford HCl salt **S-15** as a green gum (3.45 g, 51% yield).

**Data for (S)-propyl pyrrolidine-2-carboxylate hydrochloric acid salt (S-15):** light green gum; <sup>1</sup>H NMR (400 MHz, MeOD) δ 4.54-4.49 (m, 1; <sup>13</sup>C NMR (100 MHz, MeOD) δ 170.9, 70.1, 61.6, 48.0, 30.2, 25.4, 23.7, 11.4; IR (thin film, NaCl) 3393, 2880, 2723, 1741, 1398, 1243, 1058 cm<sup>-1</sup>; HRMS (ESI, Na) *m/z* calc'd for C<sub>8</sub>H<sub>16</sub>NO<sub>2</sub> (M + H)<sup>+</sup> 158.1176, found 158.1174; [α]<sub>D</sub><sup>25</sup> -33.0 (c 2.0, MeOH).

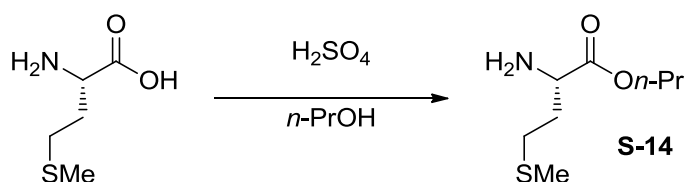

**Synthesis of (S)-propyl 2-amino-4-(methylthio)butanoate (S-14):** To *n*-PrOH (50 mL) at 0 °C was added H<sub>2</sub>SO<sub>4</sub> (8.93 mL, 168 mmol) in a drop wise manner, the solution was allowed to stir 10 minutes at 0 °C. Then (S)-methionine (5.00 g, 33.50 mmol) was added in one portion, the reaction was then allowed to warm to room temperature and stir overnight. The reaction was then diluted with water (200 mL) and basified to pH 10 with solid K<sub>2</sub>CO<sub>3</sub>. The organic layer was then extracted to EtOAc (3x 150 mL), dried over Na<sub>2</sub>SO<sub>4</sub>, filtered and concentrated *in vacuo*. The resulting residue was purified by silica gel chromatography (3% MeOH/CH<sub>2</sub>Cl<sub>2</sub>) to afford ester **S-12** as a colorless oil (2.50 g, 39%).

**Data for (S)-propyl 2-amino-4-(methylthio)butanoate (S-14):** <sup>1</sup>H NMR (400 MHz, CDCl<sub>3</sub>) δ 4.12-3.99 (m, 2H), 3.60-3.52 (m, 1H), 2.65-2.55 (m, 2H), 2.13-1.95 (m, 4H), 2.85-1.70 (m, 1H), 1.70-1.57 (m, 2H), 1.48 (s (br), 2H), 0.99-0.88 (m, 3H); <sup>13</sup>C NMR (100 MHz, CDCl<sub>3</sub>) δ 176.0, 66.8, 53.6, 34.2, 30.7, 22.2, 15.6, 10.6; IR (thin film, NaCl) 3379, 2966, 1731, 1438, 1182, 969, 838 cm<sup>-1</sup>; HRMS (ESI, Na) *m/z* calc'd for C<sub>8</sub>H<sub>18</sub>NO<sub>2</sub>S (M + H)<sup>+</sup> 192.1053, found 192.1049; [α]<sub>D</sub><sup>29</sup> -0.384 (c 1.0, CHCl<sub>3</sub>).

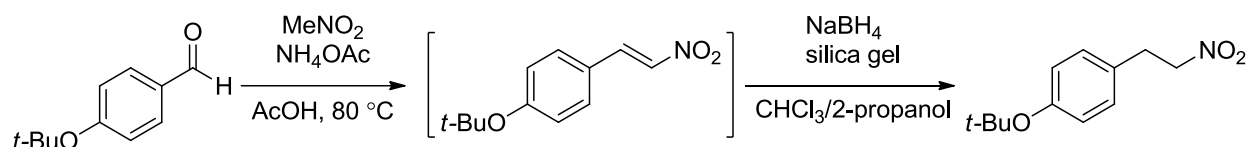

**The synthesis of 1-(tert-butoxy)-4-(2-nitroethyl)benzene (42):** A 50 mL flask equipped reflux condenser was charged with 4-(tert-butoxy)benzaldehyde (1.15 g, 6.45 mmol),  $\text{NH}_4\text{OAc}$  (1.24 g, 16.13 mmol) and  $\text{AcOH}$  (12.90 mL). To the solution at room temperature was added  $\text{MeNO}_2$  (1.08 mL, 20.00 mmol) and the reaction mixture was then heated at 60 °C for 30 minutes (TLC suggested that  $R_f$  value of desired product was the same as aldehyde). The reaction was then heated at 80 °C overnight (completion of the reaction was confirmed by LCMS). The reaction was concentrated *in vacuo*, and the resulting residue was diluted with  $\text{EtOAc}$  (200 mL) and washed with saturate aqueous  $\text{NaHCO}_3$  and brine (75 mL each), the organic layer was dried over  $\text{Na}_2\text{SO}_4$ , filtered, and concentrated *in vacuo*. The resulting residue was purified by silica gel chromatography (5-10%  $\text{EtOAc}$ /hexanes) to afford a mixture of the nitro olefin, contaminated with some aldehyde and an unidentified by-product (ca. 1 g). This mixture was used for next step without further purification.

To a solution of the nitro olefin and silica gel (2.085 g, 34.7 mmol) in  $\text{CHCl}_3$ /2-propanol (12 mL, 3/1) was added  $\text{NaBH}_4$  (0.673 g, 17.79 mmol) in a portion wise manner. After stirring for 2 hours at room temperature the reaction mixture was filtered through celite and concentrated *in vacuo*. The resulting residue was dissolved in  $\text{EtOAc}$  (150 mL) and washed with water and brine (75 mL each), dried over  $\text{Na}_2\text{SO}_4$ , filtered, and concentrated *in vacuo*. The resulting residue was purified by silica gel chromatography (20-50%  $\text{EtOAc}$ /hexanes) to afford nitro alkane title compound as a pale yellow solid (627 mg, 44% yield over 2 steps).

**Data for 1-(tert-butoxy)-4-(2-nitroethyl)benzene (42):**  $^1\text{H}$  NMR (300 MHz,  $\text{CDCl}_3$ )  $\delta$  7.09-7.07 (m, 2H), 7.00-6.91 (m, 2H), 4.58-4.55 (m, 2H), 3.26 (t,  $J = 7.4$  Hz, 2H), 1.33 (s, 9H);  $^{13}\text{C}$  NMR (75 MHz,  $\text{CDCl}_3$ )  $\delta$  154.4, 130.1, 128.8, 124.3, 78.5, 76.4, 33.0, 29.0; IR (thin film, NaCl) 2975, 2939, 1543, 1506  $\text{cm}^{-1}$ ; HRMS (ESI, Na)  $m/z$  calc'd for  $\text{C}_{12}\text{H}_{17}\text{NO}_3\text{Na}$  ( $M + \text{H}$ )<sup>+</sup> 246.1101, found 246.1101.

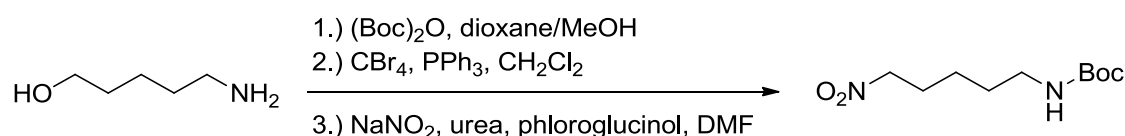

**Synthesis of tert-butyl (5-nitropentyl)carbamate (44):** To a solution of 5-aminopentan-1-ol (7.37 mL, 67.9 mmol) in dioxane (260 mL) and  $\text{MeOH}$  (180 mL) at 0 °C was added  $(\text{Boc})_2\text{O}$  (15.75 mL, 67.9 mmol). The reaction was then allowed to warm to room temperature and stir overnight. The following morning the reaction was diluted with water



(300 mL), brine (100 mL) and ether (300 mL) layers separated, and the aqueous layer extracted with ether (2x 300 mL). The combined organics were washed with 0.1 M aqueous HCl dried over MgSO<sub>4</sub> and concentrated *in vacuo* to afford a colorless residue which was carried on without further purification.

The residue was then taken up in benzene (50 mL) and concentrated (2x) to remove residual MeOH. The material was then taken up in CH<sub>2</sub>Cl<sub>2</sub> (400 mL), cooled to 0 °C and CBr<sub>4</sub> (28.1 g, 85 mmol) was added in one portion. Upon its dissolution PPh<sub>3</sub> (30.3 g, 115 mmol) was added in a portionwise manner over 20 min, until the reaction had a persistent yellow/orange color. Then 700 mL hexanes was added (a milky suspension forms) and the reaction was filtered through a plug of SiO<sub>2</sub>. The plug was then washed with 400 mL of 2:1 hexanes:CH<sub>2</sub>Cl<sub>2</sub>. The filtrate was then concentrated to afford an oil which was carried on without any further purification.

The oil was taken up in dry DMF (20 mL) and added to a stirring solution of phloroglucinol dihydrate (7.38 g, 58.6 mmol), urea (6.42 g, 107 mmol), and NaNO<sub>2</sub> (6.07 g, 88 mmol) in DMF (100 mL) at 0 °C, the solution had a slightly rose tint. The reaction was allowed to warm to room temperature and stir overnight. The reaction was then diluted with 500 mL water and extracted to ether (3x 350 mL) the combined organics were then washed with brine, dried over MgSO<sub>4</sub> and concentrated *in vacuo*. The resulting residue was purified by silica gel chromatography (20-25-30% EtOAc/hexanes) to afford the title compound as a colorless oil which solidified upon standing (46% yield over three steps).

**Data for tert-butyl (5-nitropentyl)carbamate (44):** <sup>1</sup>H NMR (400 MHz, CDCl<sub>3</sub>) δ 4.56 (s (br), 1H), 4.37 (t, *J* = 6.9 Hz, 2H), 3.20-3.02 (m, 2H), 2.09-1.96 (m, 2H), 1.61-1.34 (m, 13H); <sup>13</sup>C NMR (100 MHz, CDCl<sub>3</sub>) δ 156.2, 79.4, 75.7, 40.2, 29.6, 28.6, 27.2, 23.7; IR (thin film, NaCl) 3372, 2984, 2970, 2949, 2867, 1688, 1565, 1524, 1482, 1467, 1388, 1364, 1263, 1249, 1174, 992, 870, 651 cm<sup>-1</sup>; HRMS (ESI, Na) *m/z* calc'd for C<sub>10</sub>H<sub>20</sub>N<sub>2</sub>O<sub>4</sub>Na (M + Na)<sup>+</sup> 255.1315, found 255.1317.

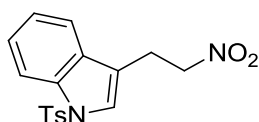

**The synthesis of 3-(2-nitroethyl)-1-tosyl-1H-indole (45):** To a solution of (*E*)-3-(2-nitrovinyl)-1-tosyl-1H-indole (0.750 g, 2.191 mmol) and silica gel (3.42 g, 57.0 mmol) in CHCl<sub>3</sub>/2-propanol (22 mL, 3/1) was added NaBH<sub>4</sub> (0.166 g, 4.38 mmol) in a portion wise manner. After stirring for 2 hours, the reaction mixture was filtered through celite and filtrate was concentrated *in vacuo*. The resulting residue was dissolved in EtOAc (150 mL), and washed with water and brine (75 mL each), dried over Na<sub>2</sub>SO<sub>4</sub>, filtered and concentrated *in vacuo*. The resulting residue was purified by silica gel chromatography (20-25%

EtOAc/hexanes) to afford the title compound as a pale brown solid (515 mg, 68% yield).

**Data for 3-(2-nitroethyl)-1-tosyl-1H-indole (45):**  $^1\text{H}$  NMR (300 MHz,  $\text{CDCl}_3$ )  $\delta$  7.97 (d,  $J$  = 8.2 Hz, 1H), 7.72 (d,  $J$  = 8.4 Hz, 2H), 7.48-7.18 (m, 6H), 4.64 (t,  $J$  = 7.1 Hz, 2H), 3.30 (t,  $J$  = 7.1 Hz, 2H), 2.33 (s, 3H);  $^{13}\text{C}$  NMR (75 MHz,  $\text{CDCl}_3$ )  $\delta$  144.8, 134.9, 134.7, 129.7, 129.5, 126.6, 125.0, 124.0, 123.3, 118.6, 116.4, 113.8, 74.4, 23.3, 21.8; IR (neat) 2991, 1724, 1553, 1370  $\text{cm}^{-1}$ ; HRMS (ESI, Na)  $m/z$  calc'd for  $\text{C}_{17}\text{H}_{16}\text{N}_2\text{NaO}_4\text{S}$  ( $M + \text{Na}$ ) $^+$  367.0723, found 367.733.

---

<sup>i</sup> G. Wuitschik, M. Rogers-Evans, K. Mueller, H. Fisher, B. Wagner, F. Schuler, L. Polonchuk, E. M. Carreira, *Angew. Chem. Int. Ed.* **2006**, *45*, 7900-7903.

<sup>ii</sup> T. Cèline, J. Remy, H. d'Orchymont *Bioorg. Med. Chem. Lett.* **1996**, *4*, 1287-1297.

<sup>iii</sup> G. Newkome, J. Kim, C. Moorefield, H. Maddi, K. Yoo *Macromolecules* **2003**, *36*, 4345-4354.
